# Supplementary material for: Early detection of clinically significant prostate cancer: protocol summary and statistical analysis plan for the ProScreen randomised trial
Source: PubMed Central journal article supplement (PMC10806703; doi:10.1136/bmjopen-2023-075595), 2024-01-09
Supplement: bmjopen-2023-075595.draft_revisions.pdf [file bmjopen-2023-075595.draft_revisions.pdf]

# BMJ Open

BMJ Open is committed to open peer review. As part of this commitment we make the peer review history of every article we publish publicly available.

When an article is published we post the peer reviewers' comments and the authors' responses online. We also post the versions of the paper that were used during peer review. These are the versions that the peer review comments apply to.

The versions of the paper that follow are the versions that were submitted during the peer review process. They are not the versions of record or the final published versions. They should not be cited or distributed as the published version of this manuscript.

BMJ Open is an open access journal and the full, final, typeset and author-corrected version of record of the manuscript is available on our site with no access controls, subscription charges or pay-per-view fees (<http://bmjopen.bmj.com>).

If you have any questions on BMJ Open's open peer review process please email [info.bmjopen@bmj.com](mailto:info.bmjopen@bmj.com)

# BMJ Open

## Protocol summary and statistical analysis plan for the randomized trial of early detection of clinically significant prostate cancer (ProScreen)

|                               |                                                                                                                                                                                                                                                                                                                                                                                                                                                                                |
|-------------------------------|--------------------------------------------------------------------------------------------------------------------------------------------------------------------------------------------------------------------------------------------------------------------------------------------------------------------------------------------------------------------------------------------------------------------------------------------------------------------------------|
| Journal:                      | <i>BMJ Open</i>                                                                                                                                                                                                                                                                                                                                                                                                                                                                |
| Manuscript ID                 | bmjopen-2023-075595                                                                                                                                                                                                                                                                                                                                                                                                                                                            |
| Article Type:                 | Protocol                                                                                                                                                                                                                                                                                                                                                                                                                                                                       |
| Date Submitted by the Author: | 12-May-2023                                                                                                                                                                                                                                                                                                                                                                                                                                                                    |
| Complete List of Authors:     | Nevalainen, Jaakko; Tampere University<br>Raitanen, Jani; Tampere University, Faculty of Social Sciences (Health Sciences) and Gerontology Research Center<br>Natonen, Kari; Tampere University<br>Kilpelainen, Tuomas; University of Helsinki; Helsinki University Central Hospital<br>Rannikko, Antti; University of Helsinki; Helsinki University Central Hospital<br>Tammela, Teuvo; Tampere University; Tampere University Hospital<br>Auvinen, Anssi; Tampere University |
| Keywords:                     | Mass Screening, Prostatic Neoplasms, Randomized Controlled Trial, STATISTICS & RESEARCH METHODS                                                                                                                                                                                                                                                                                                                                                                                |
|                               |                                                                                                                                                                                                                                                                                                                                                                                                                                                                                |

SCHOLARONE™  
Manuscripts

# Title: Protocol summary and statistical analysis plan for the randomized trial of early detection of clinically significant prostate cancer (ProScreen)

Authors: Jaakko Nevalainen<sup>1</sup>, Jani Raitanen<sup>1</sup>, Kari Natunen<sup>1</sup>, Tuomas Kilpeläinen<sup>2,3</sup>, Antti Rannikko<sup>2,3</sup>, Teuvo Tammela<sup>4</sup>, Anssi Auvinen<sup>1</sup>, and the ProScreen Trial Team

## Affiliations

1. Unit of Health Sciences, Faculty of Social Sciences, Tampere University, Tampere, Finland
2. Department of Urology, University of Helsinki and Helsinki University Hospital, Helsinki, Finland
3. Research Program in Systems Oncology, Faculty of Medicine, University of Helsinki, Helsinki, Finland
4. Tampere University Hospital, Department of Urology and Tampere University, Faculty of Medicine and Health Technology, Tampere, Finland

## ABSTRACT

**Introduction:** Evidence on the effectiveness of prostate cancer screening based on prostate-specific antigen is inconclusive and suggests a questionable balance between benefits and harms due to overdiagnosis. However, diagnostic accuracy studies have shown that detection of clinically insignificant prostate cancer can be reduced by magnetic resonance imaging combined with targeted biopsies.

The aim of the paper is to describe the analysis of the ProScreen randomized trial to assess the performance of the novel screening algorithm in terms of the primary outcome, prostate cancer mortality, and secondary outcomes as intermediate indicators of screening benefits and harms of screening.

**Methods:** The trial aims to recruit at least 111,000 men to achieve sufficient statistical power for the primary outcome. Men will be allocated in a 1:3 ratio to the screening and control arms. Interim analysis is planned at 10 years of follow-up, and the final analysis at 15 years. Difference between the trial arms in prostate cancer mortality will be assessed by Gray's test using intention to screen analysis of randomized men. Secondary outcomes will be the incidence of prostate cancer by disease aggressiveness, progression to advanced prostate cancer, death due to any cause and cost-effectiveness of screening.

**Ethics and dissemination:** The trial protocol was reviewed by the ethical committee of the Helsinki University Hospital (HUS 2910/2017). Results will be disseminated in an international peer-reviewed journal(s) and at scientific meetings.

**Trial Registration:** NCT03423303

**Keywords:** effectiveness; prostate cancer screening; randomized trial; screening algorithm

## STRENGTHS AND LIMITATIONS

- This population-based, randomized multicenter trial targeting at recruiting 111,000 men will provide high quality evidence on the effectiveness of a novel screening strategy for prostate cancer mortality
- Broad eligibility criteria and pragmatic approach embedded in normal clinical practice enhances the external validity of the trial and provide evidence applicable to decision making in public health and health care
- Challenges for the trial include the maintenance of high compliance to screening and the extent of opportunistic PSA testing in the population

For peer review only

## Introduction

Prostate cancer is the most common cancer in men in many industrialized countries and causes substantial mortality (Culp et al. 2020). Screening based on blood prostate-specific antigen (PSA) has been shown to decrease prostate cancer mortality, but the evidence from randomized trials is not conclusive (Hugosson et al. 2019, Pinsky et al. 2019). Systematic reviews of randomized controlled trials have concluded that PSA screening may at best lower prostate cancer mortality, but not all-cause mortality. However, the balance between benefits and harms was regarded as problematic due to frequent overdiagnosis, and complications from biopsies and overtreatment (Ilic et al. 2018, Fenton et al. 2018, Paschen et al. 2022).

Several studies have shown that detection of clinically insignificant prostate cancer can be reduced by magnetic resonance imaging (MRI) combined with targeted biopsies of the suspect foci, instead of systematic biopsies of the entire prostate (Schoots et al. 2015; Ahmed et al. 2017). However, previous studies have mostly focused on the diagnostic performance, i.e., cancer detection at a single evaluation. A hybrid screening/diagnostic study and a screening trial using MRI were recently published (Hugosson et al. 2022, Eklund et al. 2021).

Here we describe the analysis of the ProScreen randomized screening trial to assess the performance of a novel screening algorithm in terms of the primary outcome, prostate cancer mortality, and secondary outcomes, used as intermediate indicators of benefits and harms of screening. Following good statistical practice, this statistical analysis plan (version 1.0) was finalized prior to completion of recruitment and short-term follow-up data collection. It was written following the guidelines provided in Gamble *et al.* (2017) as applicable. Any unforeseen deviations from the plan will be described and justified carefully in the respective reports.

## Trial overview

### Trial design

The ProScreen trial is a population-based, randomized multicenter trial that investigates the effectiveness of a novel screening strategy combining PSA, a four-kallikrein panel, and MRI on prostate cancer (PCa) mortality over a 15-year period from randomization (Auvinen et al. 2017). The rationale is to minimize detection of clinically insignificant cancers, while maintaining a high sensitivity for aggressive cancers in order to reduce overdiagnosis without compromising mortality benefits. An interim analysis of PCa mortality is planned at 10 years of follow-up.

On 15 January 2018, the trial was registered at clinicaltrials.gov (NCT03423303). The ethical committee of Helsinki University Hospital reviewed the protocol (tracking no. 2910/2017). Permissions to collect data from health care registers was obtained from Finnish Institute for Health and Welfare (before the era of FinData, Dnro THL/676/5.05.00/2018). A written informed consent is provided by each participant in the screening arm.

Recruitment started in October 2018 and is still ongoing.

### Study population

All men aged 50–63 years (at the time of sampling of the trial population) with Finnish or Swedish as mother tongue residing in the trial municipalities constitute the trial population. Men with a prevalent prostate cancer will be identified through the Finnish Cancer Registry or hospital pathology databases and excluded.

We have identified for the trial the entire target population from the Digital and Population Data Services Agency, comprehensively without any sampling. The initial trial population consists of men residing in Helsinki and Tampere.

Currently, we are increasing the sample size by recruiting men also in the other municipalities within the Helsinki and Tampere metropolitan areas (Vantaa, Espoo, and Kauniainen, as well as Nokia, Lempäälä, Pirkkala, Ylöjärvi, and Kangasala with a total of 57,000 men in the target age group). The target population covers comprehensively all eligible men in the municipalities, both in the original Helsinki and Tampere areas and the new municipalities.

### Sample size

We estimated that we could find 110,000–120,000 men in the target age group based on the population projections from 2020 to 2034 from the ten municipalities (Statistics Finland 2021). We requested the overall number of deaths and the number of PCa deaths from Statistics Finland by age group from 1990 to 2019. The proportion of PCa deaths had barely changed at all during the 30-year period and hence, we based our sample size calculation on these figures. With a 1:3 random allocation to the screening arm relative to the control arm, we estimated that at least 240 PCa deaths would occur in the control arm during the first ten years of the trial, and at least 520 PCa deaths by 15 years of follow-up.

Assuming a relative hazard of 0.75 for the screening relative to the control arm, Schoenfeld's formula indicates that an 80% power would be reached by a total of 506 PCa deaths (Schoenfeld 1983) with type I error rate set at 5%. Assuming a total of 650 PCa deaths – 520 in the control arm and 130 in the screening arm – the power of the study would be 89%. Hence, we aim at a final sample size of at least 111,000 men to ensure adequate statistical power and precision at the final analysis.

### Randomization and screening intervals

All eligible men will be randomly allocated to screening and control arms in a 1:3 ratio. Within the screening arm, re-screening interval is adapted by the baseline PSA:

- Men with initial PSA  $\geq 3$  ng/ml are re-invited every two years,
- Men with PSA 1.5–2.99 ng/ml every four years, and
- Men with PSA  $< 1.5$  ng/ml after six years.

By the time of writing this plan, we have randomized 61,193 men with 15,299 allocated to the screening arm and 45,894 to the control arm. Analyses will compare the entire screening arm, regardless of the actual screening attendance and interval employed, to the control arm, unless otherwise specified.

Randomization list consists of batches of randomized men. The list is generated centrally by a designated study biostatistician at the coordinating unit, who maintains the documentation including program codes and the resulting lists include information of randomization dates, personal identification numbers (linkable to study ID number) and the arm allocated. Randomization lists are only shared confidentially to study personnel if needed for study conduct.

## Screening procedures

At every screening attendance, three consecutive tests are conducted in a stepwise manner before biopsy:

1. All participating men give a blood sample for determination of PSA at a local laboratory.
2. If the PSA is 3 ng/ml or higher, a four-kallikrein panel is analyzed from a second vial of plasma from the initial draw using an algorithm incorporating four proteins (total PSA, free PSA, intact PSA and human kallikrein-2) and age. The result is expressed as probability of a clinically significant PCa.
3. Men with both  $\text{PSA} \geq 3$  and kallikrein score  $\geq 7.5\%$  are referred to MRI. T2-weighted, diffusion-weighted and dynamic contrast-enhanced imaging is employed in accordance with the European Society for Urogenital Radiology guideline (de Rooij 2020). The findings are classified according to the Prostate Imaging Reporting and Data System (PI-RADS v2.1), which is a 5-point scale to combine the MRI findings and indicate the likelihood of a significant cancer. Scores of 3–5 indicate at least a suspect finding warranting directed biopsy.

Only targeted biopsies are employed, with 2–4 cores per region of interest depending on the size. Only screen-positive men with negative MRI but PSA density  $>0.15$  undergo systematic biopsy as a safety measure (to avoid missing clinically significant cancers). Similar fusion-guided biopsy systems are used at the two trial sites and evaluated by experienced uropathologists using standardized procedures.

A random sample of screen-negative (on test steps 1 and 2) men are also invited to prostate MRI and asked to give blood, urine and stool samples in order to serve as a control group to estimate frequency of suspicious MRI findings in the general population, and as a reference group in analyses of biological samples.

## Protocol deviations

A tabular presentation of different types of protocol deviations along with their frequencies and percentages will be presented. Any protocol deviations detected after randomization will be carefully documented. Among them, men later found out not to have met the eligibility criteria at the date of randomization can be excluded from the analysis (post-randomization exclusions).

In the case of major protocol violations affecting a substantial proportion of men, separate per protocol analyses will be conducted to support the main analyses. In the screening arm, incomplete attendance, or compliance with the screening procedures is likely to occur. In the control arm, we will obtain data on contamination, i.e., mostly self-initiated PSA testing.

When considering unforeseen lack of compliance with the protocol, all means to ensure objectivity in the exclusion principles from per protocol analyses will be taken. Participants in both arms will be considered according to the same principles. Protocol deviations not related to the screening procedures are expected to appear in approximately 1:3 ratio for the arms. Obvious deviation from this ratio would be reported and interpreted as a potential source of bias.

## Blinding

Blinding in the conventional sense is not applicable: men are aware of being invited to screening. Hence, this is an open trial with screening and control arms.

Concrete measures to prevent bias, if any, from the awareness of the trial arm were nevertheless taken: (i) the control arm is blind to the fact that they are part of the trial; (ii) allocation concealment is ensured by the centralized randomization procedure preventing foreknowledge of upcoming arm allocation; and (iii) communication to the general public on trial is kept to the minimum to prevent contamination (e.g. by self-initiated PSA testing) among men in the control arm.

In addition, we underline that the primary outcome of the study, PCa death, is an objective outcome. The possibility of bias in its evaluation only relates to the assessment of the cause of death. The death certificates are filled by physicians with no involvement in the trial and can be assumed to be independent of trial arm, especially as deaths from prostate cancer are likely to occur years after the diagnosis and hence unaffected by detection through screening or other means. Importantly, a previous study within the ERSPC trial has shown that the cause-of-death data provided by Statistics Finland agreed almost perfectly with the assessment of a blinded expert panel in the Finnish center of the trial and was independent of the trial arm (Mäkinen et al. 2008, Kilpeläinen et al. 2016).

## Data collection process

Table 1 summarizes the stages of the data collection process, targeted participants, and information and samples obtained.

**Table 1.** Data collection process of the ProScreen trial.

| Process stage   | Target population                                | Information collected                                                                                                                                                                                                                                                                                                                                   | Samples collected                                                                                 |
|-----------------|--------------------------------------------------|---------------------------------------------------------------------------------------------------------------------------------------------------------------------------------------------------------------------------------------------------------------------------------------------------------------------------------------------------------|---------------------------------------------------------------------------------------------------|
| <b>Baseline</b> | Participants                                     | Family history<br>Previous PSA and Bx<br>Generic QoL/utility (15D, EQ5D)<br>Out-of-pocket costs<br>PSA and four-kallikrein panel                                                                                                                                                                                                                        | Plasma<br>Serum<br>Whole blood                                                                    |
| <b>MRI</b>      | Men with PSA >3 ng/ml and kallikrein score >7.5% | PIRADS score                                                                                                                                                                                                                                                                                                                                            | Digital image                                                                                     |
| <b>Biopsy</b>   | Screen-positive men                              | Post-biopsy symptoms (0, 30 days)<br><br>Targeted fusion biopsies: number of ROIs, number of biopsies, length of samples,<br><br>Systemic biopsies: Biopsy length, cancer length and Gleason score per sample, total length of samples, total length of cancer, portion of cancer, global Gleason score, portion of Gleason 4 or 5, perineural invasion | Urine<br>Stool<br>RNA, DNA<br>Cancer tissue and prostate tissue<br>Plasma<br>Serum<br>Whole blood |



|                         |                          |                                                                                                                                                                                                      |  |
|-------------------------|--------------------------|------------------------------------------------------------------------------------------------------------------------------------------------------------------------------------------------------|--|
| <b>Cancer diagnosis</b> | Men with prostate cancer | Disease-specific QoL (EPIC-26, MAX-PC)<br><br>Generic QoL/utility (EQ5D, 15D), out-of-pocket costs<br><br>Gleason/ISUP grade group, number of positive cores, length of cancer, treatment, TNM stage |  |
|-------------------------|--------------------------|------------------------------------------------------------------------------------------------------------------------------------------------------------------------------------------------------|--|

### Study outcomes and other relevant variables

The primary outcome of the trial is death from prostate cancer. Causes of death will be obtained from the Statistics Finland database and the underlying causes of death will be considered when evaluating if the man died from PCa or from other causes. Cancer cases in the entire trial population including the control arm and non-participants in the screening arm are identified from pathology databases of the two hospitals and through linkages to the Finnish Cancer Registry using the unique PID assigned to all Finnish residents to ensure complete coverage and avoid duplicates (double count).

#### Secondary outcomes are:

- Diagnosis of prostate cancer (divided into clinically significant and insignificant)
- Progression to advanced prostate cancer (biochemical relapse or progression to metastatic)
- Death due to any cause
- Cost-effectiveness of screening

#### Adverse outcome variables to monitor screening-related harms are:

- Overdiagnosis of clinically insignificant prostate cancer
- Quality of life impacts of screening and quality of life among men with PCa (EPIC26 instrument)
- Prostate cancer-related anxiety (MAX-PC questionnaire)
- Complications from biopsy (PRECISION questionnaire)

### Statistical analysis

The main analyses will rely on the intention to screen (ITS) principle and will include all randomized men in the two trial arms who were alive and eligible (free of prostate cancer) at the date of randomization. Those men who became ineligible between the date of randomization and first screening invitation will remain in the ITS analysis set.

Two-sided statistical tests will be used, and the overall significance level will be set at 5%. Corresponding p-values will be accompanied with estimates of differences and their 95% confidence intervals.

#### Analysis of the primary outcome

The primary outcome of the trial is death from prostate cancer. This is a superiority trial regarding the primary outcome and the comparisons between trial arms will be analyzed and presented on this basis.

1  
2  
3 Those men who survived will be considered as right-censored observations at the time passed  
4 between the time of analysis and time of randomization period. Those men who were lost to  
5 follow-up (e.g., due to emigration) will be considered as censored at that particular time (e.g.,  
6 at emigration). Time to death, defined as the difference between the date of death and date of  
7 randomization, will be used as the event time for the analysis.  
8

9  
10 To evaluate differences between screening and control arms in prostate cancer specific  
11 mortality, Gray's test (Gray 1988) for testing the null hypothesis of equality of cumulative  
12 incidence functions will be used. This test differs from the commonly used logrank test in how  
13 competing risks of death are treated and is based on the subdistribution hazard of prostate  
14 cancer cause of death.  
15

16  
17 The test will be complemented by reporting the number of PCa deaths, number of men at risk  
18 and estimated cumulative incidence functions for each trial arm over follow-up time. The arms  
19 will be compared in absolute risks (number needed to invite i.e., the inverse of the risk  
20 difference and number needed to diagnose per averted prostate cancer death, i.e., the ratio of  
21 excess incidence to mortality reduction), as well as and relative measures of effect (hazard  
22 ratios). Descriptive summaries will also be presented by trial centers, age group at  
23 randomization.  
24

#### 25 26 Secondary analyses of the primary outcome

27  
28 Fine-Gray model for the subdistribution hazard will be used to conduct analyses adjusted for  
29 background factors. Outcomes will be compared between age groups and trial centers, and in  
30 case of differences, analyses to control for trial center and for age at randomization (categorized  
31 as 50–54, 55–59, 60–65 years) will be conducted.  
32

33  
34 Per protocol analyses excluding men with substantial protocol deviations, such as repeated  
35 non-attendance or ineligibility before invitation to screening (with pseudo invitation dates for  
36 the control arm), will be conducted if considered pertinent. Additional analyses to correct for  
37 contamination and non-compliance, i.e., estimation of efficacy, will be taken by best practices  
38 methods at the time of the analyses (e.g., Cuzick et al. 1997).  
39

40  
41 Descriptive analyses to study effect heterogeneity by center and age group will be performed  
42 to complement these analyses. Additional analyses requested by external reviewers or editors  
43 in peer-review processes will also be done.

#### 44 Analysis of secondary outcomes

##### 45 Diagnosis of prostate cancer

46  
47 The analysis of cumulative incidence of PCa by disease aggressiveness intends to assess  
48 screening impact on detection of clinically significant PCa (representing potential benefit  
49 through early treatment) and clinically insignificant PCa (indicating overdiagnosis). The  
50 intention is to assess the extent of detection of clinically significant PCa by screening relative  
51 to the control arm, and extent of overdiagnosis relative to the control arm. This will inform  
52 about the degree of accomplishing rationale of the trial, i.e., detection of aggressive cases at  
53 least similar to that in PSA-based screening, while substantially decreasing the yield of low-  
54 risk cases. As screening advances the time of diagnosis by several years (lead time), cumulative  
55 incidence will be used as the indicator of risk.  
56

57  
58 Disease aggressiveness will be defined by the International Society for Urological Pathology  
59 (ISUP) Gleason grade group. The analyses will be conducted separately for the detection of  
60 clinically significant (Gleason 7+ or ISUP 2+) and clinically insignificant (Gleason <7 or ISUP

1  
2  
3 1) PCa. In secondary analyses, alternative criteria for csPCa will also be employed including  
4 ISUP 3+ (Gleason 4+3 or higher), maximum length of cancer tissue in biopsy and number of  
5 biopsy cores with cancer.  
6

7 Risk differences and ratios will be used to infer screening benefits and overdiagnosis compared  
8 to the control arm. Besides cumulative incidence, the ratio of aggressive to non-aggressive  
9 cases (or proportion of aggressive cancers out of all PCa) will also be reported.  
10

11 Cumulative incidence for both outcomes will be estimated by trial arm. The overall PCa  
12 incidence combines screening benefits and harms and is thus regarded of minor importance in  
13 the interpretation of screening impact. Tabular presentations of age at diagnosis, disease stage  
14 and grade at diagnosis will be presented.  
15

16 Both intention to screen (by allocation) and per protocol (screening participants and non-  
17 participants) analyses will be conducted for each screening round. For screening participants,  
18 screen-detected and interval cases will be reported separately, and screen-detected cases will  
19 be broken down by those detected in targeted biopsies of MRI-positive lesions (screening  
20 protocol evaluated) and systematic biopsies in screen-negative men with PSA density >0.15  
21 (safety measure to avoid missing clinically significant cases). Any cases detected in a random  
22 sample of screen-negative men invited to MRI (analyses to assess underlying prevalence of  
23 prostate cancer) will also be reported separately. Analyses to evaluate an optimized screening  
24 algorithm will include exclusion of cases with PI-RADS score 3 and kallikrein score calculated  
25 also incorporating information on previous biopsies (ignored in the main analysis), as well as  
26 using higher cut-off values for PSA and the kallikrein score.  
27  
28  
29

### 30 Advanced prostate cancer

31  
32 The analysis of advanced prostate cancer will compare the cumulative incidence of cancer  
33 progression, including metastasis and/or biochemical relapse developing after diagnosis and  
34 primary treatment, between the screening and control arms. The purpose of the analysis is to  
35 evaluate differences between the arms in the risk of developing a potentially lethal, advanced  
36 PCa.  
37

38 The origin of the analysis will be the time of randomization. Cumulative incidence rates will  
39 be estimated by the Kaplan-Meier method, and differences between trial arms will be estimated  
40 by Cox regression models adjusted by age at diagnosis.  
41

### 42 Death due to any cause

43  
44 The analysis of all-cause mortality aims to show that the trials arms are comparable with each  
45 other and the general male population in Finland. These analyses will not inform about the  
46 effectiveness of screening. Cumulative survival and mortality rates will be estimated by the  
47 Kaplan-Meier method, from time of randomization, displayed with frequencies of events and  
48 men at risk by trial arm, and by age at randomization.  
49

50 This analysis will focus on the intention to screen analysis set.  
51

### 52 Cost-effectiveness

53  
54 A cost-effectiveness analysis will be performed, incorporating cost data for both out-of-pocket  
55 estimated from surveys and service cost data collected from health care providers, as well  
56 mortality results (ITS analysis) and utilities based on repeated surveys with 15D and EQ5D  
57 instruments (on a random sample of participants). The comparator is no active screening, here  
58 represented by the control arm. The main outcome is the incremental cost-effectiveness ratio  
59 in terms of costs per quality-adjusted life-year.  
60

1  
2  
3 A preliminary and exploratory cost effectiveness study can be conducted after the last of the  
4 follow-up surveys have been returned, approximately at 3 years after the randomization of the  
5 last man into the trial. We plan to undertake a full cost-effectiveness analysis around the time  
6 when the evidence on the effectiveness of screening regarding primary outcome has been  
7 obtained; this will most likely be near to the analysis at 15 years.  
8

### 9 Quality of life

11 These analyses aim to evaluate the short-term and long-term impacts of screening on generic  
12 quality of life as well as disease-specific quality of life among men with PCa. Two disease-  
13 specific questionnaires, EPIC26 instrument and MAX-PC questionnaires will be used to  
14 measure quality of life at 0, 6, 12, and 24 months from PCa diagnosis in both trial arms.  
15

16 Standard scoring of the EPIC26 instrument will be used. Summary statistics of the five key  
17 domains over time and by trial arm will be calculated to assess changes in quality of life of  
18 men with PCa from diagnosis onwards. Summary and domain-grouped scores will be analyzed  
19 using applications of linear models (or their nonparametric counterparts, if needed) for repeated  
20 measures to evaluate differences in quality of life between the arms following PCa diagnosis.  
21

22 Prostate cancer related anxiety is measured with the Memorial Anxiety Scale for Prostate  
23 Cancer (MAX-PC) questionnaire (Roth et al. 2003). Results will be presented as frequencies  
24 and percentages for total and subscale scores by trial arm.  
25

26 Generic quality of life and utilities are evaluated using the 15D and EQ5D instruments as  
27 described in the cost-effectiveness section.  
28

### 29 Analysis of adverse outcomes

30 In addition to detection of low-risk disease by screening as an indicator of overdiagnosis,  
31 adverse outcomes mainly relate to the harms due to biopsies. Adverse effects of prostate biopsy  
32 are monitored using the questionnaire developed for the PRECISION trial covering pain and  
33 other symptoms immediately after biopsy and at 30 days following biopsy. The number of  
34 biopsies, as well as the number (%) and type of complications among those with biopsies will  
35 be reported.  
36  
37  
38  
39

### 40 Interim analyses and data monitoring

41 The first analysis of PCa mortality will be conducted at 10 years and the final analysis at 15  
42 years (i.e. at median follow-up time of 10 or 15 years). As we do not intend to stop the trial at  
43 10 years, these interim analyses will be considered as preliminary information. Interim analyses  
44 at 10 years will include also analyses of shorter-term benefits.  
45

46 To control the overall type I error rate (5%) of the trial, we will employ the O'Brien-Fleming  
47 rule for alpha spending function. We set the amount of information at 0.5 at 10 years based on  
48 the expected numbers of PCa deaths. Thus, by implementation of the O'Brien-Fleming  
49 algorithm, the resulting significance level at 10-year interim analysis will be 0.0056, and at the  
50 15-year final analysis 0.0444.  
51

52 Analyses of secondary endpoints informing about the intermediate outcomes of process  
53 indicators including participation, cancer detection, validity and diagnostic performance of the  
54 tests in the entire population and subgroups (screened men, non-participants, men in the control  
55 arm) will be carried out at regular intervals, as sufficient data become available for evaluation.  
56 These will inform about potential need to modify the procedures. Side studies using the samples  
57 collected will be carried out to identify new indicators of prostate cancer risk and prognosis.  
58  
59  
60

1  
2  
3 An independent data monitoring committee (DMC) oversees the trial conduct, and its main  
4 task is to ensure safety of the participants. Safety in this context means that screening or  
5 screening procedures should not lead to unacceptable disadvantage for the participants in the  
6 light of screening benefits. This could take place if the screening intervention had materially  
7 worse performance in detecting clinically relevant prostate cancer than anticipated, or  
8 substantially higher level of overdiagnosis. The DMC is given a report of the screening results  
9 initially every six months and after the first year every 12 months. The DMC can also request  
10 any additional information they regard as pertinent to their task. In case of concern, the DMC  
11 can recommend discontinuation of the trial; in practice that would mean stopping recruitment  
12 and discontinuation of further screening procedures. In addition, they have a mandate to  
13 suggest modifications to the trial protocol.  
14

### 15 16 Handling of missing data

17 Extent of missing data will be described, for example, by presenting the number of individuals  
18 with missing values per variable.  
19

20 For outcome variables relying on dates – dates of randomization, censoring, diagnosis or death  
21 – incomplete dates will be imputed by 15 (in the case that the day variable was missing, but  
22 known month and year), and by 30/6 (in the case that only the year was known).  
23

24 In case a substantial proportion of men (at least 5%) have missing data on one or more variable  
25 needed for the effectiveness analysis in question, multiple imputation methods will be used to  
26 demonstrate the robustness of findings (Little *et al.* 2012). Imputation models will include  
27 outcome variables and trial arm in addition to all variables relevant to the particular analysis.  
28 Final estimates will be derived by combining estimates and their standard errors across data  
29 sets using Rubin's rules.  
30

### 31 32 Data management and quality assurance

33 RedCap database application is used for data management in the trial, covering all major data  
34 types from questionnaires and lab results to MRI findings, diagnoses and causes of death.  
35 RedCap allows access defined by two-factor authentication (2FA) and flexible definition of  
36 user-specific functions and rights.  
37

38 In REDCap, variable specific parameters and predetermined options are used to prevent  
39 entering invalid data (e.g. predefined values and acceptable ranges). All data is verified from  
40 the original data source and monitored monthly. Until the verification, data is saved as  
41 incomplete or unverified. Lead times between screening tests are monitored every 6-8 weeks.  
42 For the laboratory work (including sampling, processing, and storing) each task has a protocol  
43 shared by the study centers. Any deviations from the sample specific protocol are documented.  
44

### 45 46 Conclusion

47 This statistical analysis plan lays out the plans for outcomes of the trial, including the  
48 definitions of important outcomes, analysis principles and interpretation, methods for primary  
49 analysis, pre-specified subgroup analysis, and secondary analysis.  
50

### 51 52 References

53 Ahmed HU, El-Shater Bosaily A, Brown LC, *et al.* Diagnostic accuracy of multi-parametric  
54 MRI and TRUS biopsy in prostate cancer (PROMIS): a paired validating confirmatory study.  
55 *Lancet* 2017; 389:815-822. doi: 10.1016/S0140-6736(16)32401-1. PMID: 28110982.  
56  
57  
58  
59  
60

1  
2  
3 Auvinen A, Rannikko A, Taari K, *et al.* A randomized trial of early detection of clinically  
4 significant prostate cancer (ProScreen): study design and rationale. *Eur J Epidemiol* 2017;  
5 32:521-527. doi: 10.1007/s10654-017-0292-5. PMID: 28762124.

6  
7  
8 Culp MB, Soerjomataram I, Efstathiou JA, *et al.* Recent global patterns in prostate cancer  
9 incidence and mortality rates. *Eur Urol* 2020; 77:38-52

10  
11 Cuzick J, Edwards R, Segnan N. Adjusting for non-compliance and contamination in  
12 randomized clinical trials. *Stat Med* 1997; 16:1017-29. doi: 10.1002/(sici)1097-  
13 0258(19970515)16:9<1017::aid-sim508>3.0.co;2-v. Erratum in: *Stat Med* 2007;26:3821.  
14 PMID: 9160496.

15  
16 Eklund M, Jäderling F, Discacciati A, *et al.* MRI-Targeted or Standard Biopsy in Prostate  
17 Cancer Screening. *N Engl J Med* 2021; 385:908-920. doi: 10.1056/NEJMoa2100852. PMID:  
18 34237810.

19  
20  
21 Fenton JJ, Weyrich MS, Durbin S, *et al.* Prostate-specific antigen-based screening for prostate  
22 cancer. *JAMA* 2018; 319:1914-31.

23  
24  
25 Gamble C, Krishan A, Stocken D, *et al.* Guidelines for the content of statistical analysis plans  
26 in clinical trials. *JAMA* 2017; 318:2337-43. <https://doi.org/10.1001/jama.2017.18556>.

27  
28 Gray RJ: A class of K-sample tests for comparing the cumulative incidence of a competing  
29 risk. *Ann Stat* 1988; 16:1141-1154.

30  
31 Hugosson J, Roobol MJ, Månsson M, *et al.* 16-year follow-up of the European Randomised  
32 Study of Screening for Prostate Cancer (ERSPC). *Eur Urol* 2019; 76:43-51.

33  
34 Hugosson J, Månsson M, Wallström J, *et al.* Prostate Cancer Screening with PSA and MRI  
35 Followed by Targeted Biopsy Only. *N Engl J Med.* 2022; 387:2126-2137. doi:  
36 10.1056/NEJMoa2209454. PMID: 36477032.

37  
38  
39 Ilic D, Djulbegovic M, Jung JH, *et al.* Prostate cancer screening with prostate-specific antigen  
40 (PSA) test: a systematic review and meta-analysis. *BMJ* 2018; 362:k3519. doi:  
41 10.1136/bmj.k3519. PMID: 30185521.

42  
43 Kilpeläinen TP, Mäkinen T, Karhunen PJ, *et al.* Estimating bias in causes of death  
44 ascertainment in the Finnish Randomized Study of Screening for Prostate Cancer. *Cancer*  
45 *Epidemiol* 2016; 45:1-5. doi: 10.1016/j.canep.2016.08.022. PMID: 27636505.

46  
47  
48 Little RJ, D'Agostino R, Cohen ML, *et al.* The prevention and treatment of missing data in  
49 clinical trials. *N Engl J Med* 2012; 367:1355-60. doi: 10.1056/NEJMsr1203730. PMID:  
50 23034025.

51  
52 Mäkinen T, Karhunen P, Aro J, *et al.* Assessment of causes of death in a prostate cancer  
53 screening trial. *Int J Cancer* 2008; 122: 413-417. <https://doi.org/10.1002/ijc.23126>

54  
55  
56 Paschen U, Sturz S, Fleer D, *et al.* Assessment of prostate-specific antigen screening. *BJU Int*  
57 2022;129:280-289

1  
2  
3 Pinsky PF, Miller E, Prorok P, *et al.* Extended follow-up for prostate cancer incidence and  
4 mortality among participants in the PLCO screening trial. *BJU Int* 2019;123:854-860  
5

6 Schoots IG, Roobol MJ, Nieboer D, *et al.* Magnetic resonance imaging-targeted biopsy may  
7 enhance the diagnostic accuracy of significant prostate cancer detection compared to standard  
8 transrectal ultrasound-guided biopsy: a systematic review and meta-analysis. *Eur Urol* 2015;  
9 68:438-50. doi: 10.1016/j.eururo.2014.11.037. PMID: 25480312.  
10

11 Rannikko A, Leht M, Mirtti T, *et al.* Population-based randomized trial of screening for  
12 clinically significant prostate cancer ProScreen: a pilot study. *BJU Int* 2022; 130:193-199.  
13 doi: 10.1111/bju.15683. PMID: 34958531.  
14

15 de Rooij M, Israël B, Tummers M, *et al.* ESUR/ESUI consensus statements on multi-  
16 parametric MRI for the detection of clinically significant prostate cancer: quality  
17 requirements for image acquisition, interpretation and radiologists' training. *Eur Radiol* 2020;  
18 30:5404-5416. doi: 10.1007/s00330-020-06929-z. PMID: 32424596.  
19

20 Roth AJ, Rosenfeld, B, Kornblith AB, *et al.* The memorial anxiety scale for prostate cancer.  
21 *Cancer* 2003; 97:2910-18  
22

23 Statistics Finland's StatFin online service. Available at:  
24 <https://statfin.stat.fi/PXWeb/pxweb/en/StatFin/> (Accessed 9 June 2021).  
25

26  
27 Schoenfeld DA. Sample-size formula for the proportional-hazards regression model.  
28 *Biometrics* 1983; 39:499-503.  
29

### 30 31 32 **Authors' contributions**

33 All authors approved the final version of this manuscript. Study concept and design: AA, AR,  
34 JN, JR, KN, TK, TT; drafting of the manuscript: AA, JN; critical revision of the manuscript  
35 for important intellectual content: AA, AR, JN, JR, KN, TK, TT.  
36

### 37 **Funding statement**

38 This work was supported by the Academy of Finland (grant number 311336) the Finnish  
39 Cancer Foundation, the Jane and Aatos Erkko foundation, Competitive State Research  
40 Funding administered by Tampere University Hospital (grant number 9V02), and Päivikki  
41 and Sakari Sohlberg Foundation.  
42  
43  
44  
45  
46  
47  
48  
49  
50  
51  
52  
53  
54  
55  
56  
57  
58  
59  
60

# Title: Protocol summary and statistical analysis plan for the randomized trial of early detection of clinically significant prostate cancer (ProScreen)

Authors: Jaakko Nevalainen<sup>1</sup>, Jani Raitanen<sup>1</sup>, Kari Natunen<sup>1</sup>, Tuomas Kilpeläinen<sup>2,3</sup>, Antti Rannikko<sup>2,3</sup>, Teuvo Tammela<sup>4</sup>, Anssi Auvinen<sup>1</sup>, and the ProScreen Trial Team

## Affiliations

1. Unit of Health Sciences, Faculty of Social Sciences, Tampere University, Tampere, Finland
2. Department of Urology, University of Helsinki and Helsinki University Hospital, Helsinki, Finland
3. Research Program in Systems Oncology, Faculty of Medicine, University of Helsinki, Helsinki, Finland
4. Tampere University Hospital, Department of Urology and Tampere University, Faculty of Medicine and Health Technology, Tampere, Finland

## ABSTRACT

**Introduction:** Evidence on the effectiveness of prostate cancer screening based on prostate-specific antigen is inconclusive and suggests a questionable balance between benefits and harms due to overdiagnosis. However, diagnostic accuracy studies have shown that detection of clinically insignificant prostate cancer can be reduced by magnetic resonance imaging combined with targeted biopsies.

The aim of the paper is to describe the analysis of the ProScreen randomized trial to assess the performance of the novel screening algorithm in terms of the primary outcome, prostate cancer mortality, and secondary outcomes as intermediate indicators of screening benefits and harms of screening.

**Methods:** The trial aims to recruit at least 111,000 men to achieve sufficient statistical power for the primary outcome. Men will be allocated in a 1:3 ratio to the screening and control arms. Interim analysis is planned at 10 years of follow-up, and the final analysis at 15 years. Difference between the trial arms in prostate cancer mortality will be assessed by Gray's test using intention to screen analysis of randomized men. Secondary outcomes will be the incidence of prostate cancer by disease aggressiveness, progression to advanced prostate cancer, death due to any cause and cost-effectiveness of screening.

**Ethics and dissemination:** The trial protocol was reviewed by the ethical committee of the Helsinki University Hospital (HUS 2910/2017). Results will be disseminated in an international peer-reviewed journal(s) and at scientific meetings.

**Trial Registration:** NCT03423303

**Keywords:** effectiveness; prostate cancer screening; randomized trial; screening algorithm



### STRENGTHS AND LIMITATIONS

- This population-based, randomized multicenter trial targeting at recruiting 111,000 men will provide high quality evidence on the effectiveness of a novel screening strategy for prostate cancer mortality
- Broad eligibility criteria and pragmatic approach embedded in normal clinical practice enhances the external validity of the trial and provide evidence applicable to decision making in public health and health care
- Challenges for the trial include the maintenance of high compliance to screening and the extent of opportunistic PSA testing in the population

For peer review only

## Introduction

Prostate cancer is the most common cancer in men in many industrialized countries and causes substantial mortality (Culp et al. 2020). Screening based on blood prostate-specific antigen (PSA) has been shown to decrease prostate cancer mortality, but the evidence from randomized trials is not conclusive (Hugosson et al. 2019, Pinsky et al. 2019). Systematic reviews of randomized controlled trials have concluded that PSA screening may at best lower prostate cancer mortality, but not all-cause mortality. However, the balance between benefits and harms was regarded as problematic due to frequent overdiagnosis, and complications from biopsies and overtreatment (Ilic et al. 2018, Fenton et al. 2018, Paschen et al. 2022).

Several studies have shown that detection of clinically insignificant prostate cancer can be reduced by magnetic resonance imaging (MRI) combined with targeted biopsies of the suspect foci, instead of systematic biopsies of the entire prostate (Schoots et al. 2015; Ahmed et al. 2017). However, previous studies have mostly focused on the diagnostic performance, i.e., cancer detection at a single evaluation. A hybrid screening/diagnostic study and a screening trial using MRI were recently published (Hugosson et al. 2022, Eklund et al. 2021).

Here we describe the analysis of the ProScreen randomized screening trial to assess the performance of a novel screening algorithm in terms of the primary outcome, prostate cancer mortality, and secondary outcomes, used as intermediate indicators of benefits and harms of screening. Following good statistical practice, this statistical analysis plan (version 1.0) was finalized prior to completion of recruitment and short-term follow-up data collection. It was written following the guidelines provided in Gamble *et al.* (2017) as applicable. Any unforeseen deviations from the plan will be described and justified carefully in the respective reports.

## Trial overview

### Trial design

The ProScreen trial is a population-based, randomized multicenter trial that investigates the effectiveness of a novel screening strategy combining PSA, a four-kallikrein panel, and MRI on prostate cancer (PCa) mortality over a 15-year period from randomization (Auvinen et al. 2017). The rationale is to minimize detection of clinically insignificant cancers, while maintaining a high sensitivity for aggressive cancers in order to reduce overdiagnosis without compromising mortality benefits. An interim analysis of PCa mortality is planned at 10 years of follow-up.

On 15 January 2018, the trial was registered at clinicaltrials.gov (NCT03423303). The ethical committee of Helsinki University Hospital reviewed the protocol (tracking no. 2910/2017). Permissions to collect data from health care registers was obtained from Finnish Institute for Health and Welfare (before the era of FinData, Dnro THL/676/5.05.00/2018). A written informed consent is provided by each participant in the screening arm.

Recruitment started in October 2018 and is still ongoing.

### Study population

All men aged 50–63 years (at the time of sampling of the trial population) with Finnish or Swedish as mother tongue residing in the trial municipalities constitute the trial population. Men with a prevalent prostate cancer will be identified through the Finnish Cancer Registry or hospital pathology databases and excluded.

We have identified for the trial the entire target population from the Digital and Population Data Services Agency, comprehensively without any sampling. The initial trial population consists of men residing in Helsinki and Tampere.

Currently, we are increasing the sample size by recruiting men also in the other municipalities within the Helsinki and Tampere metropolitan areas (Vantaa, Espoo, and Kauniainen, as well as Nokia, Lempäälä, Pirkkala, Ylöjärvi, and Kangasala with a total of 57,000 men in the target age group). The target population covers comprehensively all eligible men in the municipalities, both in the original Helsinki and Tampere areas and the new municipalities.

### Sample size

We estimated that we could find 110,000–120,000 men in the target age group based on the population projections from 2020 to 2034 from the ten municipalities (Statistics Finland 2021). We requested the overall number of deaths and the number of PCa deaths from Statistics Finland by age group from 1990 to 2019. The proportion of PCa deaths had barely changed at all during the 30-year period and hence, we based our sample size calculation on these figures. With a 1:3 random allocation to the screening arm relative to the control arm, we estimated that at least 240 PCa deaths would occur in the control arm during the first ten years of the trial, and at least 520 PCa deaths by 15 years of follow-up.

Assuming a relative hazard of 0.75 for the screening relative to the control arm, Schoenfeld's formula indicates that an 80% power would be reached by a total of 506 PCa deaths (Schoenfeld 1983) with type I error rate set at 5%. Assuming a total of 650 PCa deaths – 520 in the control arm and 130 in the screening arm – the power of the study would be 89%. Hence, we aim at a final sample size of at least 111,000 men to ensure adequate statistical power and precision at the final analysis.

### Randomization and screening intervals

All eligible men will be randomly allocated to screening and control arms in a 1:3 ratio. Within the screening arm, re-screening interval is adapted by the baseline PSA:

- Men with initial PSA  $\geq 3$  ng/ml are re-invited every two years,
- Men with PSA 1.5–2.99 ng/ml every four years, and
- Men with PSA  $< 1.5$  ng/ml after six years.

By the time of writing this plan, we have randomized 61,193 men with 15,299 allocated to the screening arm and 45,894 to the control arm. Analyses will compare the entire screening arm, regardless of the actual screening attendance and interval employed, to the control arm, unless otherwise specified.

Randomization list consists of batches of randomized men. The list is generated centrally by a designated study biostatistician at the coordinating unit, who maintains the documentation including program codes and the resulting lists include information of randomization dates, personal identification numbers (linkable to study ID number) and the arm allocated. Randomization lists are only shared confidentially to study personnel if needed for study conduct.

### Screening procedures

At every screening attendance, three consecutive tests are conducted in a stepwise manner before biopsy:

1. All participating men give a blood sample for determination of PSA at a local laboratory.
2. If the PSA is 3 ng/ml or higher, a four-kallikrein panel is analyzed from a second vial of plasma from the initial draw using an algorithm incorporating four proteins (total PSA, free PSA, intact PSA and human kallikrein-2) and age. The result is expressed as probability of a clinically significant PCa.
3. Men with both  $PSA \geq 3$  and kallikrein score  $\geq 7.5\%$  are referred to MRI. T2-weighted, diffusion-weighted and dynamic contrast-enhanced imaging is employed in accordance with the European Society for Urogenital Radiology guideline (de Rooij 2020). The findings are classified according to the Prostate Imaging Reporting and Data System (PI-RADS v2.1), which is a 5-point scale to combine the MRI findings and indicate the likelihood of a significant cancer. Scores of 3–5 indicate at least a suspect finding warranting directed biopsy.

Only targeted biopsies are employed, with 2–4 cores per region of interest depending on the size. Only screen-positive men with negative MRI but PSA density  $>0.15$  undergo systematic biopsy as a safety measure (to avoid missing clinically significant cancers). Similar fusion-guided biopsy systems are used at the two trial sites and evaluated by experienced urologists using standardized procedures.

A random sample of screen-negative (on test steps 1 and 2) men are also invited to prostate MRI and asked to give blood, urine and stool samples in order to serve as a control group to estimate frequency of suspicious MRI findings in the general population, and as a reference group in analyses of biological samples.

### Protocol deviations

A tabular presentation of different types of protocol deviations along with their frequencies and percentages will be presented. Any protocol deviations detected after randomization will be carefully documented. Among them, men later found out not to have met the eligibility criteria at the date of randomization can be excluded from the analysis (post-randomization exclusions).

In the case of major protocol violations affecting a substantial proportion of men, separate per protocol analyses will be conducted to support the main analyses. In the screening arm, incomplete attendance, or compliance with the screening procedures is likely to occur. In the control arm, we will obtain data on contamination, i.e., mostly self-initiated PSA testing.

When considering unforeseen lack of compliance with the protocol, all means to ensure objectivity in the exclusion principles from per protocol analyses will be taken. Participants in both arms will be considered according to the same principles. Protocol deviations not related to the screening procedures are expected to appear in approximately 1:3 ratio for the arms. Obvious deviation from this ratio would be reported and interpreted as a potential source of bias.

## Blinding

Blinding in the conventional sense is not applicable: men are aware of being invited to screening. Hence, this is an open trial with screening and control arms.

Concrete measures to prevent bias, if any, from the awareness of the trial arm were nevertheless taken: (i) the control arm is blind to the fact that they are part of the trial; (ii) allocation concealment is ensured by the centralized randomization procedure preventing foreknowledge of upcoming arm allocation; and (iii) communication to the general public on trial is kept to the minimum to prevent contamination (e.g. by self-initiated PSA testing) among men in the control arm.

In addition, we underline that the primary outcome of the study, PCa death, is an objective outcome. The possibility of bias in its evaluation only relates to the assessment of the cause of death. The death certificates are filled by physicians with no involvement in the trial and can be assumed to be independent of trial arm, especially as deaths from prostate cancer are likely to occur years after the diagnosis and hence unaffected by detection through screening or other means. Importantly, a previous study within the ERSPC trial has shown that the cause-of-death data provided by Statistics Finland agreed almost perfectly with the assessment of a blinded expert panel in the Finnish center of the trial and was independent of the trial arm (Mäkinen et al. 2008, Kilpeläinen et al. 2016).

## Data collection process

Table 1 summarizes the stages of the data collection process, targeted participants, and information and samples obtained.

**Table 1.** Data collection process of the ProScreen trial.

| Process stage   | Target population                                | Information collected                                                                                                                                                                                                                                                                                                                                   | Samples collected                                                                                 |
|-----------------|--------------------------------------------------|---------------------------------------------------------------------------------------------------------------------------------------------------------------------------------------------------------------------------------------------------------------------------------------------------------------------------------------------------------|---------------------------------------------------------------------------------------------------|
| <b>Baseline</b> | Participants                                     | Family history<br>Previous PSA and Bx<br>Generic QoL/utility (15D, EQ5D)<br>Out-of-pocket costs<br>PSA and four-kallikrein panel                                                                                                                                                                                                                        | Plasma<br>Serum<br>Whole blood                                                                    |
| <b>MRI</b>      | Men with PSA >3 ng/ml and kallikrein score >7.5% | PIRADS score                                                                                                                                                                                                                                                                                                                                            | Digital image                                                                                     |
| <b>Biopsy</b>   | Screen-positive men                              | Post-biopsy symptoms (0, 30 days)<br><br>Targeted fusion biopsies: number of ROIs, number of biopsies, length of samples,<br><br>Systemic biopsies: Biopsy length, cancer length and Gleason score per sample, total length of samples, total length of cancer, portion of cancer, global Gleason score, portion of Gleason 4 or 5, perineural invasion | Urine<br>Stool<br>RNA, DNA<br>Cancer tissue and prostate tissue<br>Plasma<br>Serum<br>Whole blood |
| <b>Cancer</b>   | Men with                                         | Disease-specific QoL (EPIC-26, MAX-PC)                                                                                                                                                                                                                                                                                                                  |                                                                                                   |

|                  |                 |                                                                                                                                                        |  |
|------------------|-----------------|--------------------------------------------------------------------------------------------------------------------------------------------------------|--|
| <b>diagnosis</b> | prostate cancer | Generic Qol/utility (EQ5D, 15D), out-of-pocket costs<br><br>Gleason/ISUP grade group, number of positive cores, length of cancer, treatment, TNM stage |  |
|------------------|-----------------|--------------------------------------------------------------------------------------------------------------------------------------------------------|--|

### Study outcomes and other relevant variables

The primary outcome of the trial is death from prostate cancer. Causes of death will be obtained from the Statistics Finland database and the underlying causes of death will be considered when evaluating if the man died from PCa or from other causes. Cancer cases in the entire trial population including the control arm and non-participants in the screening arm are identified from pathology databases of the two hospitals and through linkages to the Finnish Cancer Registry using the unique PID assigned to all Finnish residents to ensure complete coverage and avoid duplicates (double count).

#### Secondary outcomes are:

- Diagnosis of prostate cancer (divided into clinically significant and insignificant)
- Progression to advanced prostate cancer (biochemical relapse or progression to metastatic)
- Death due to any cause
- Cost-effectiveness of screening

#### Adverse outcome variables to monitor screening-related harms are:

- Overdiagnosis of clinically insignificant prostate cancer
- Quality of life impacts of screening and quality of life among men with PCa (EPIC26 instrument)
- Prostate cancer-related anxiety (MAX-PC questionnaire)
- Complications from biopsy (PRECISION questionnaire)

### Statistical analysis

The main analyses will rely on the intention to screen (ITS) principle and will include all randomized men in the two trial arms who were alive and eligible (free of prostate cancer) at the date of randomization. Those men who became ineligible between the date of randomization and first screening invitation will remain in the ITS analysis set.

Two-sided statistical tests will be used, and the overall significance level will be set at 5%. Corresponding p-values will be accompanied with estimates of differences and their 95% confidence intervals.

#### Analysis of the primary outcome

The primary outcome of the trial is death from prostate cancer. This is a superiority trial regarding the primary outcome and the comparisons between trial arms will be analyzed and presented on this basis.

Those men who survived will be considered as right-censored observations at the time passed between the time of analysis and time of randomization period. Those men who were lost to

1  
2  
3 follow-up (e.g., due to emigration) will be considered as censored at that particular time (e.g.,  
4 at emigration). Time to death, defined as the difference between the date of death and date of  
5 randomization, will be used as the event time for the analysis.

6  
7 To evaluate differences between screening and control arms in prostate cancer specific  
8 mortality, Gray's test (Gray 1988) for testing the null hypothesis of equality of cumulative  
9 incidence functions will be used. This test differs from the commonly used logrank test in  
10 how competing risks of death are treated and is based on the subdistribution hazard of  
11 prostate cancer cause of death.

12  
13 The test will be complemented by reporting the number of PCa deaths, number of men at risk  
14 and estimated cumulative incidence functions for each trial arm over follow-up time. The  
15 arms will be compared in absolute risks (number needed to invite i.e., the inverse of the risk  
16 difference and number needed to diagnose per averted prostate cancer death, i.e., the ratio of  
17 excess incidence to mortality reduction), as well as and relative measures of effect (hazard  
18 ratios). Descriptive summaries will also be presented by trial centers, age group at  
19 randomization.

### 20 21 22 Secondary analyses of the primary outcome

23 Fine-Gray model for the subdistribution hazard will be used to conduct analyses adjusted for  
24 background factors. Outcomes will be compared between age groups and trial centers, and in  
25 case of differences, analyses to control for trial center and for age at randomization  
26 (categorized as 50–54, 55–59, 60–65 years) will be conducted.

27  
28 Per protocol analyses excluding men with substantial protocol deviations, such as repeated  
29 non-attendance or ineligibility before invitation to screening (with pseudo invitation dates for  
30 the control arm), will be conducted if considered pertinent. Additional analyses to correct for  
31 contamination and non-compliance, i.e., estimation of efficacy, will be taken by best  
32 practices methods at the time of the analyses (e.g., Cuzick et al. 1997).

33  
34 Descriptive analyses to study effect heterogeneity by center and age group will be performed  
35 to complement these analyses. Additional analyses requested by external reviewers or editors  
36 in peer-review processes will also be done.

### 37 38 Analysis of secondary outcomes

#### 39 Diagnosis of prostate cancer

40  
41 The analysis of cumulative incidence of PCa by disease aggressiveness intends to assess  
42 screening impact on detection of clinically significant PCa (representing potential benefit  
43 through early treatment) and clinically insignificant PCa (indicating overdiagnosis). The  
44 intention is to assess the extent of detection of clinically significant PCa by screening relative  
45 to the control arm, and extent of overdiagnosis relative to the control arm. This will inform  
46 about the degree of accomplishing rationale of the trial, i.e., detection of aggressive cases at  
47 least similar to that in PSA-based screening, while substantially decreasing the yield of low-  
48 risk cases. As screening advances the time of diagnosis by several years (lead time),  
49 cumulative incidence will be used as the indicator of risk.

50  
51 Disease aggressiveness will be defined by the International Society for Urological Pathology  
52 (ISUP) Gleason grade group. The analyses will be conducted separately for the detection of  
53 clinically significant (Gleason 7+ or ISUP 2+) and clinically insignificant (Gleason <7 or  
54 ISUP 1) PCa. In secondary analyses, alternative criteria for csPCa will also be employed

1  
2  
3 including ISUP 3+ (Gleason 4+3 or higher), maximum length of cancer tissue in biopsy and  
4 number of biopsy cores with cancer.

5  
6 Risk differences and ratios will be used to infer screening benefits and overdiagnosis  
7 compared to the control arm. Besides cumulative incidence, the ratio of aggressive to non-  
8 aggressive cases (or proportion of aggressive cancers out of all PCa) will also be reported.

9  
10 Cumulative incidence for both outcomes will be estimated by trial arm. The overall PCa  
11 incidence combines screening benefits and harms and is thus regarded of minor importance in  
12 the interpretation of screening impact. Tabular presentations of age at diagnosis, disease stage  
13 and grade at diagnosis will be presented.

14  
15 Both intention to screen (by allocation) and per protocol (screening participants and non-  
16 participants) analyses will be conducted for each screening round. For screening participants,  
17 screen-detected and interval cases will be reported separately, and screen-detected cases will  
18 be broken down by those detected in targeted biopsies of MRI-positive lesions (screening  
19 protocol evaluated) and systematic biopsies in screen-negative men with PSA density >0.15  
20 (safety measure to avoid missing clinically significant cases). Any cases detected in a random  
21 sample of screen-negative men invited to MRI (analyses to assess underlying prevalence of  
22 prostate cancer) will also be reported separately. Analyses to evaluate an optimized screening  
23 algorithm will include exclusion of cases with PI-RADS score 3 and kallikrein score  
24 calculated also incorporating information on previous biopsies (ignored in the main analysis),  
25 as well as using higher cut-off values for PSA and the kallikrein score.

#### 26 27 Advanced prostate cancer

28  
29 The analysis of advanced prostate cancer will compare the cumulative incidence of cancer  
30 progression, including metastasis and/or biochemical relapse developing after diagnosis and  
31 primary treatment, between the screening and control arms. The purpose of the analysis is to  
32 evaluate differences between the arms in the risk of developing a potentially lethal, advanced  
33 PCa.

34  
35 The origin of the analysis will be the time of randomization. Cumulative incidence rates will  
36 be estimated by the Kaplan-Meier method, and differences between trial arms will be  
37 estimated by Cox regression models adjusted by age at diagnosis.

#### 38 39 Death due to any cause

40  
41 The analysis of all-cause mortality aims to show that the trials arms are comparable with each  
42 other and the general male population in Finland. These analyses will not inform about the  
43 effectiveness of screening. Cumulative survival and mortality rates will be estimated by the  
44 Kaplan-Meier method, from time of randomization, displayed with frequencies of events and  
45 men at risk by trial arm, and by age at randomization.

46  
47 This analysis will focus on the intention to screen analysis set.

#### 48 49 Cost-effectiveness

50  
51 A cost-effectiveness analysis will be performed, incorporating cost data for both out-of-  
52 pocket estimated from surveys and service cost data collected from health care providers, as  
53 well mortality results (ITS analysis) and utilities based on repeated surveys with 15D and  
54 EQ5D instruments (on a random sample of participants). The comparator is no active  
55 screening, here represented by the control arm. The main outcome is the incremental cost-  
56 effectiveness ratio in terms of costs per quality-adjusted life-year.



1  
2  
3 A preliminary and exploratory cost effectiveness study can be conducted after the last of the  
4 follow-up surveys have been returned, approximately at 3 years after the randomization of the  
5 last man into the trial. We plan to undertake a full cost-effectiveness analysis around the time  
6 when the evidence on the effectiveness of screening regarding primary outcome has been  
7 obtained; this will most likely be near to the analysis at 15 years.  
8

### 9 Quality of life

10 These analyses aim to evaluate the short-term and long-term impacts of screening on generic  
11 quality of life as well as disease-specific quality of life among men with PCa. Two disease-  
12 specific questionnaires, EPIC26 instrument and MAX-PC questionnaires will be used to  
13 measure quality of life at 0, 6, 12, and 24 months from PCa diagnosis in both trial arms.  
14

15 Standard scoring of the EPIC26 instrument will be used. Summary statistics of the five key  
16 domains over time and by trial arm will be calculated to assess changes in quality of life of  
17 men with PCa from diagnosis onwards. Summary and domain-grouped scores will be  
18 analyzed using applications of linear models (or their nonparametric counterparts, if needed)  
19 for repeated measures to evaluate differences in quality of life between the arms following  
20 PCa diagnosis.  
21

22 Prostate cancer related anxiety is measured with the Memorial Anxiety Scale for Prostate  
23 Cancer (MAX-PC) questionnaire (Roth et al. 2003). Results will be presented as frequencies  
24 and percentages for total and subscale scores by trial arm.  
25

26 Generic quality of life and utilities are evaluated using the 15D and EQ5D instruments as  
27 described in the cost-effectiveness section.  
28

### 29 Analysis of adverse outcomes

30 In addition to detection of low-risk disease by screening as an indicator of overdiagnosis,  
31 adverse outcomes mainly relate to the harms due to biopsies. Adverse effects of prostate  
32 biopsy are monitored using the questionnaire developed for the PRECISION trial covering  
33 pain and other symptoms immediately after biopsy and at 30 days following biopsy. The  
34 number of biopsies, as well as the number (%) and type of complications among those with  
35 biopsies will be reported.  
36  
37  
38

### 39 Interim analyses and data monitoring

40 The first analysis of PCa mortality will be conducted at 10 years and the final analysis at 15  
41 years (i.e. at median follow-up time of 10 or 15 years). As we do not intend to stop the trial at  
42 10 years, these interim analyses will be considered as preliminary information. Interim  
43 analyses at 10 years will include also analyses of shorter-term benefits.  
44

45 To control the overall type I error rate (5%) of the trial, we will employ the O'Brien-Fleming  
46 rule for alpha spending function. We set the amount of information at 0.5 at 10 years based  
47 on the expected numbers of PCa deaths. Thus, by implementation of the O'Brien-Fleming  
48 algorithm, the resulting significance level at 10-year interim analysis will be 0.0056, and at  
49 the 15-year final analysis 0.0444.  
50

51 Analyses of secondary endpoints informing about the intermediate outcomes of process  
52 indicators including participation, cancer detection, validity and diagnostic performance of  
53 the tests in the entire population and subgroups (screened men, non-participants, men in the  
54 control arm) will be carried out at regular intervals, as sufficient data become available for  
55 evaluation. These will inform about potential need to modify the procedures. Side studies  
56  
57  
58  
59

1  
2  
3 using the samples collected will be carried out to identify new indicators of prostate cancer  
4 risk and prognosis.

5  
6 An independent data monitoring committee (DMC) oversees the trial conduct, and its main  
7 task is to ensure safety of the participants. Safety in this context means that screening or  
8 screening procedures should not lead to unacceptable disadvantage for the participants in the  
9 light of screening benefits. This could take place if the screening intervention had materially  
10 worse performance in detecting clinically relevant prostate cancer than anticipated, or  
11 substantially higher level of overdiagnosis. The DMC is given a report of the screening  
12 results initially every six months and after the first year every 12 months. The DMC can also  
13 request any additional information they regard as pertinent to their task. In case of concern,  
14 the DMC can recommend discontinuation of the trial; in practice that would mean stopping  
15 recruitment and discontinuation of further screening procedures. In addition, they have a  
16 mandate to suggest modifications to the trial protocol.

### 17 18 Handling of missing data

19 Extent of missing data will be described, for example, by presenting the number of  
20 individuals with missing values per variable.

21  
22 For outcome variables relying on dates – dates of randomization, censoring, diagnosis or  
23 death – incomplete dates will be imputed by 15 (in the case that the day variable was missing,  
24 but known month and year), and by 30/6 (in the case that only the year was known).

25  
26 In case a substantial proportion of men (at least 5%) have missing data on one or more  
27 variable needed for the effectiveness analysis in question, multiple imputation methods will  
28 be used to demonstrate the robustness of findings (Little *et al.* 2012). Imputation models will  
29 include outcome variables and trial arm in addition to all variables relevant to the particular  
30 analysis. Final estimates will be derived by combining estimates and their standard errors  
31 across data sets using Rubin's rules.

### 32 33 Data management and quality assurance

34 RedCap database application is used for data management in the trial, covering all major data  
35 types from questionnaires and lab results to MRI findings, diagnoses and causes of death.  
36 RedCap allows access defined by two-factor authentication (2FA) and flexible definition of  
37 user-specific functions and rights.

38  
39 In REDCap, variable specific parameters and predetermined options are used to prevent  
40 entering invalid data (e.g. predefined values and acceptable ranges). All data is verified from  
41 the original data source and monitored monthly. Until the verification, data is saved as  
42 incomplete or unverified. Lead times between screening tests are monitored every 6-8 weeks.  
43 For the laboratory work (including sampling, processing, and storing) each task has a  
44 protocol shared by the study centers. Any deviations from the sample specific protocol are  
45 documented.

### 46 47 48 Conclusion

49 This statistical analysis plan lays out the plans for outcomes of the trial, including the  
50 definitions of important outcomes, analysis principles and interpretation, methods for primary  
51 analysis, pre-specified subgroup analysis, and secondary analysis.

## References

Ahmed HU, El-Shater Bosaily A, Brown LC, *et al.* Diagnostic accuracy of multi-parametric MRI and TRUS biopsy in prostate cancer (PROMIS): a paired validating confirmatory study. *Lancet* 2017; 389:815-822. doi: 10.1016/S0140-6736(16)32401-1. PMID: 28110982.

Auvinen A, Rannikko A, Taari K, *et al.* A randomized trial of early detection of clinically significant prostate cancer (ProScreen): study design and rationale. *Eur J Epidemiol* 2017; 32:521-527. doi: 10.1007/s10654-017-0292-5. PMID: 28762124.

Culp MB, Soerjomataram I, Efstathiou JA, *et al.* Recent global patterns in prostate cancer incidence and mortality rates. *Eur Urol* 2020; 77:38-52

Cuzick J, Edwards R, Segnan N. Adjusting for non-compliance and contamination in randomized clinical trials. *Stat Med* 1997; 16:1017-29. doi: 10.1002/(sici)1097-0258(19970515)16:9<1017::aid-sim508>3.0.co;2-v. Erratum in: *Stat Med* 2007;26:3821. PMID: 9160496.

Eklund M, Jäderling F, Discacciati A, *et al.* MRI-Targeted or Standard Biopsy in Prostate Cancer Screening. *N Engl J Med* 2021; 385:908-920. doi: 10.1056/NEJMoa2100852. PMID: 34237810.

Fenton JJ, Weyrich MS, Durbin S, *et al.* Prostate-specific antigen-based screening for prostate cancer. *JAMA* 2018; 319:1914-31.

Gamble C, Krishan A, Stocken D, *et al.* Guidelines for the content of statistical analysis plans in clinical trials. *JAMA* 2017; 318:2337-43. <https://doi.org/10.1001/jama.2017.18556>.

Gray RJ: A class of K-sample tests for comparing the cumulative incidence of a competing risk. *Ann Stat* 1988; 16:1141-1154.

Hugosson J, Roobol MJ, Månsson M, *et al.* 16-year follow-up of the European Randomised Study of Screening for Prostate Cancer (ERSPC). *Eur Urol* 2019; 76:43-51.

Hugosson J, Månsson M, Wallström J, *et al.* Prostate Cancer Screening with PSA and MRI Followed by Targeted Biopsy Only. *N Engl J Med.* 2022; 387:2126-2137. doi: 10.1056/NEJMoa2209454. PMID: 36477032.

Ilic D, Djulbegovic M, Jung JH, *et al.* Prostate cancer screening with prostate-specific antigen (PSA) test: a systematic review and meta-analysis. *BMJ* 2018; 362:k3519. doi: 10.1136/bmj.k3519. PMID: 30185521.

Kilpeläinen TP, Mäkinen T, Karhunen PJ, *et al.* Estimating bias in causes of death ascertainment in the Finnish Randomized Study of Screening for Prostate Cancer. *Cancer Epidemiol* 2016; 45:1-5. doi: 10.1016/j.canep.2016.08.022. PMID: 27636505.

Little RJ, D'Agostino R, Cohen ML, *et al.* The prevention and treatment of missing data in clinical trials. *N Engl J Med* 2012; 367:1355-60. doi: 10.1056/NEJMs1203730. PMID: 23034025.

Mäkinen T, Karhunen P, Aro J, *et al.* Assessment of causes of death in a prostate cancer screening trial. *Int J Cancer* 2008; 122: 413-417. <https://doi.org/10.1002/ijc.23126>

1  
2  
3  
4  
5 Paschen U, Sturz S, Fler D, *et al.* Assessment of prostate-specific antigen screening. *BJU Int*  
6 2022;129:280-289

7 Pinsky PF, Miller E, Prorok P, *et al.* Extended follow-up for prostate cancer incidence and  
8 mortality among participants in the PLCO screening trial. *BJU Int* 2019;123:854-860  
9

10 Schoots IG, Roobol MJ, Nieboer D, *et al.* Magnetic resonance imaging-targeted biopsy may  
11 enhance the diagnostic accuracy of significant prostate cancer detection compared to standard  
12 transrectal ultrasound-guided biopsy: a systematic review and meta-analysis. *Eur Urol* 2015;  
13 68:438-50. doi: 10.1016/j.eururo.2014.11.037. PMID: 25480312.  
14

15 Rannikko A, Leht M, Mirtti T, *et al.* Population-based randomized trial of screening for  
16 clinically significant prostate cancer ProScreen: a pilot study. *BJU Int* 2022; 130:193-199.  
17 doi: 10.1111/bju.15683. PMID: 34958531.  
18

19 de Rooij M, Israël B, Tummers M, *et al.* ESUR/ESUI consensus statements on multi-  
20 parametric MRI for the detection of clinically significant prostate cancer: quality  
21 requirements for image acquisition, interpretation and radiologists' training. *Eur Radiol* 2020;  
22 30:5404-5416. doi: 10.1007/s00330-020-06929-z. PMID: 32424596.  
23

24 Roth AJ, Rosenfeld, B, Kornblith AB, *et al.* The memorial anxiety scale for prostate cancer.  
25 *Cancer* 2003; 97:2910-18  
26

27 Statistics Finland's StatFin online service. Available at:  
28 <https://statfin.stat.fi/PXWeb/pxweb/en/StatFin/> (Accessed 9 June 2021).  
29

30 Schoenfeld DA. Sample-size formula for the proportional-hazards regression model.  
31 *Biometrics* 1983; 39:499-503.  
32

### 33 34 **Authors' contributions**

35 All authors approved the final version of this manuscript. Study concept and design: AA, AR,  
36 JN, JR, KN, TK, TT; drafting of the manuscript: AA, JN; critical revision of the manuscript  
37 for important intellectual content: AA, AR, JN, JR, KN, TK, TT.  
38

### 39 **Funding statement**

40 This work was supported by the Academy of Finland (grant number 311336) the Finnish  
41 Cancer Foundation, the Jane and Aatos Erkko foundation, Competitive State Research  
42 Funding administered by Tampere University Hospital (grant number 9V02), and Päivikki  
43 and Sakari Sohlberg Foundation.  
44  
45  
46  
47  
48  
49  
50  
51  
52  
53  
54  
55  
56  
57  
58  
59  
60

# BMJ Open

## Protocol summary and statistical analysis plan for the randomized trial of early detection of clinically significant prostate cancer (ProScreen)

|                                 |                                                                                                                                                                                                                                                                                                                                                                                                                                                                                |
|---------------------------------|--------------------------------------------------------------------------------------------------------------------------------------------------------------------------------------------------------------------------------------------------------------------------------------------------------------------------------------------------------------------------------------------------------------------------------------------------------------------------------|
| Journal:                        | <i>BMJ Open</i>                                                                                                                                                                                                                                                                                                                                                                                                                                                                |
| Manuscript ID                   | bmjopen-2023-075595.R1                                                                                                                                                                                                                                                                                                                                                                                                                                                         |
| Article Type:                   | Protocol                                                                                                                                                                                                                                                                                                                                                                                                                                                                       |
| Date Submitted by the Author:   | 07-Dec-2023                                                                                                                                                                                                                                                                                                                                                                                                                                                                    |
| Complete List of Authors:       | Nevalainen, Jaakko; Tampere University<br>Raitanen, Jani; Tampere University, Faculty of Social Sciences (Health Sciences) and Gerontology Research Center<br>Natonen, Kari; Tampere University<br>Kilpelainen, Tuomas; University of Helsinki; Helsinki University Central Hospital<br>Rannikko, Antti; University of Helsinki; Helsinki University Central Hospital<br>Tammela, Teuvo; Tampere University; Tampere University Hospital<br>Auvinen, Anssi; Tampere University |
| <b>Primary Subject Heading</b>: | Urology                                                                                                                                                                                                                                                                                                                                                                                                                                                                        |
| Secondary Subject Heading:      | Epidemiology, Oncology, Public health                                                                                                                                                                                                                                                                                                                                                                                                                                          |
| Keywords:                       | Mass Screening, Prostatic Neoplasms, Randomized Controlled Trial, STATISTICS & RESEARCH METHODS                                                                                                                                                                                                                                                                                                                                                                                |
|                                 |                                                                                                                                                                                                                                                                                                                                                                                                                                                                                |

SCHOLARONE™  
Manuscripts

# Title: Protocol summary and statistical analysis plan for the randomized trial of early detection of clinically significant prostate cancer (ProScreen)

Authors: Jaakko Nevalainen<sup>1,\*</sup>, Jani Raitanen<sup>1,2</sup>, Kari Natunen<sup>1</sup>, Tuomas Kilpeläinen<sup>3,4</sup>, Antti Rannikko<sup>3,4</sup>, Teuvo Tammela<sup>5</sup>, Anssi Auvinen<sup>1</sup>, and the ProScreen Trial Team

## Affiliations

1. Unit of Health Sciences, Faculty of Social Sciences, Tampere University, Tampere, Finland
2. The UKK Institute for Health Promotion Research, Tampere, Finland
3. Department of Urology, University of Helsinki and Helsinki University Hospital, Helsinki, Finland
4. Research Program in Systems Oncology, Faculty of Medicine, University of Helsinki, Helsinki, Finland
5. Tampere University Hospital, Department of Urology and Tampere University, Faculty of Medicine and Health Technology, Tampere, Finland

\* = Corresponding author (email: [jaakko.nevalainen@tuni.fi](mailto:jaakko.nevalainen@tuni.fi))

## ABSTRACT

**Introduction:** Evidence on the effectiveness of prostate cancer screening based on prostate-specific antigen is inconclusive and suggests a questionable balance between benefits and harms due to overdiagnosis. However, diagnostic accuracy studies have shown that detection of clinically insignificant prostate cancer can be reduced by magnetic resonance imaging combined with targeted biopsies.

The aim of the paper is to describe the analysis of the ProScreen randomized trial to assess the performance of the novel screening algorithm in terms of the primary outcome, prostate cancer mortality, and secondary outcomes as intermediate indicators of screening benefits and harms of screening.

**Methods:** The trial aims to recruit at least 111,000 men to achieve sufficient statistical power for the primary outcome. Men will be allocated in a 1:3 ratio to the screening and control arms. Interim analysis is planned at 10 years of follow-up, and the final analysis at 15 years. Difference between the trial arms in prostate cancer mortality will be assessed by Gray's test using intention to screen analysis of randomized men. Secondary outcomes will be the incidence of prostate cancer by disease aggressiveness, progression to advanced prostate cancer, death due to any cause and cost-effectiveness of screening.

**Ethics and dissemination:** The trial protocol was reviewed by the ethical committee of the Helsinki University Hospital (HUS 2910/2017). Results will be disseminated through publications in international peer-reviewed journals and at scientific meetings.

**Trial Registration:** NCT03423303

**Keywords:** effectiveness; prostate cancer screening; randomized trial; screening algorithm

## STRENGTHS AND LIMITATIONS

- This population-based, randomized multicenter trial targeting at recruiting 111,000 men will provide high quality evidence on the effectiveness of a novel screening strategy for prostate cancer mortality
- Broad eligibility criteria and pragmatic approach embedded in normal clinical practice enhances the external validity of the trial and provide evidence applicable to decision making in public health and health care
- Challenges for the trial include the maintenance of high compliance to screening and the extent of opportunistic PSA testing in the population

For peer review only

## Introduction

Prostate cancer is the most common cancer in men in many industrialized countries and causes substantial mortality [1]. Screening based on blood prostate-specific antigen (PSA) has been shown to decrease prostate cancer mortality, but the evidence from randomized trials is not conclusive [2, 3]. Systematic reviews of randomized controlled trials have concluded that PSA screening may at best lower prostate cancer mortality, but not all-cause mortality. However, the balance between benefits and harms was regarded as problematic due to frequent overdiagnosis, and complications from biopsies and overtreatment [4, 5, 6].

Several studies have shown that detection of clinically insignificant prostate cancer can be reduced by magnetic resonance imaging (MRI) combined with targeted biopsies of the suspect foci, instead of systematic biopsies of the entire prostate [7, 8]. However, previous studies have mostly focused on the diagnostic performance, i.e., cancer detection at a single evaluation. A hybrid screening/diagnostic study and a screening trial using MRI were recently published [9, 10].

Here we describe the analysis of the ProScreen randomized screening trial to assess the performance of a novel screening algorithm in terms of the primary outcome, prostate cancer mortality, and secondary outcomes, used as intermediate indicators of benefits and harms of screening. Following good statistical practice, this statistical analysis plan (version: 1.1) was finalized prior to completion of recruitment and short-term follow-up data collection. It was written following the guidelines provided in Gamble *et al.* [11] as applicable. Any unforeseen deviations from the plan will be described and justified carefully in the respective reports.

## Trial overview

### Trial design

The ProScreen trial is a population-based, randomized multicenter trial that investigates the effectiveness of a novel screening strategy combining PSA, a four-kallikrein panel, and MRI on prostate cancer (PCa) mortality over a 15-year period from randomization [12]. The rationale is to minimize detection of clinically insignificant cancers, while maintaining a high sensitivity for aggressive cancers in order to reduce overdiagnosis without compromising mortality benefits. An interim analysis of PCa mortality is planned at 10 years of follow-up.

### Ethics and Dissemination

On 15 January 2018, the trial was registered at clinicaltrials.gov (NCT03423303). The ethical committee of Helsinki University Hospital reviewed the protocol (tracking no. 2910/2017). Permissions to collect data from health care registers was obtained from Finnish Institute for Health and Welfare (before the era of FinData, Dnro THL/676/5.05.00/2018). A written informed consent is provided by each participant in the screening arm. Results will be disseminated through publications in international peer-reviewed journals and at scientific meetings.

Recruitment started in October 2018 and is still ongoing.

### Patient and public involvement

Patients or the public were not involved in the design, or conduct, or reporting, or dissemination plans of our research.

### Study population

All men aged 50–63 years (at the time of sampling of the trial population) with Finnish or Swedish as mother tongue residing in the trial municipalities constitute the trial population.



1  
2  
3 Men with a prevalent prostate cancer will be identified through the Finnish Cancer Registry or  
4 hospital pathology databases and excluded.  
5

6 We have identified for the trial the entire target population from the Digital and Population  
7 Data Services Agency, comprehensively without any sampling. The initial trial population  
8 consists of men residing in Helsinki and Tampere.  
9

10  
11 Currently, we are increasing the sample size by recruiting men also in the other municipalities  
12 within the Helsinki and Tampere metropolitan areas (Vantaa, Espoo, and Kauniainen, as well  
13 as Nokia, Lempäälä, Pirkkala, Ylöjärvi, and Kangasala with a total of 57,000 men in the target  
14 age group). The target population covers comprehensively all eligible men in the  
15 municipalities, both in the original Helsinki and Tampere areas and the new municipalities.  
16  
17

### 18 19 Sample size

20 We estimated that we could find 110,000–120,000 men in the target age group based on the  
21 population projections from 2020 to 2034 from the ten municipalities [13]. We requested the  
22 overall number of deaths and the number of PCa deaths from Statistics Finland by age group  
23 from 1990 to 2019. The proportion of PCa deaths had barely changed at all during the 30-year  
24 period and hence, we based our sample size calculation on these figures. With a 1:3 random  
25 allocation to the screening arm relative to the control arm, we expected that we would follow-  
26 up on 82 500 men in the control arm. Based on population statistics and causes of death  
27 registries, for the first ten years of the trial, we estimated PCa mortality to be 50 deaths per  
28 100,000 person-years. For the entire 15 years follow-up, our estimate was 67 deaths per  
29 100,000 person-years. Given deaths due to other causes, we thus expected to include at least  
30 240 and 520 PCa deaths in the control arm during the first 10 and 15 years of the trial,  
31 respectively.  
32  
33

34 Considering that a PSA-based screening could result into a 20% reduction in PCa mortality [2],  
35 and that the addition of MRI and 4K to the screening protocol could improve the ability to  
36 detect clinically significant PCa [14], we assumed a relative hazard of 0.75 for the screening  
37 relative to the control arm. Schoenfeld's formula indicates that an 80% power would be reached  
38 by a total of 506 PCa deaths [15] with type I error rate set at 5%. Assuming a total of 650 PCa  
39 deaths – 520 in the control arm and 130 in the screening arm – the power of the study would  
40 be 89%. Hence, we aim at a final sample size of at least 111,000 men to ensure adequate  
41 statistical power and precision at the final analysis.  
42  
43

### 44 45 Randomization and screening intervals

46 All eligible men will be randomly allocated to screening and control arms in a 1:3 ratio. The  
47 rationale for the unequal randomization arose from the logistics in the conduct of the trial: we  
48 first estimated the maximum number of men that could be screened with existing resources.  
49 Given that the size of the control arm that does not receive any intervention has hardly any  
50 resource implications, we decided on an allocation ratio that would yield a manageable size of  
51 the intervention arm. Hence, the underlying rationale was to fix the size of the screening and  
52 maximize the size of the control arm to optimize the power of the study given the context  
53 (source population).  
54  
55

56  
57 Within the screening arm, re-screening interval is adapted by the baseline PSA:

- 58 • Men with initial  $PSA \geq 3$  ng/ml are re-invited every two years,
- 59 • Men with PSA 1.5–2.99 ng/ml every four years, and  
60

- Men with PSA < 1.5 ng/ml after six years.

The control arm is unaware of being part of the trial, as they are not contacted or subject to any trial procedures. At prostate cancer diagnosis, the aim is that all men in the control arm will also answer questionnaires, but otherwise they are treated according to standard clinical practice according to the well-established national treatment guidelines throughout the trial.

By the time of writing this plan, we have randomized 61,193 men with 15,299 allocated to the screening arm and 45,894 to the control arm. Analyses will compare the entire screening arm, regardless of the actual screening attendance and interval employed, to the control arm, unless otherwise specified.

Randomization list consists of batches of randomized men, *i.e.*, randomization list is generated in parts to ensure that the time between randomization and the invitation to the trial would not be excessive. Stratified randomization was not considered necessary. The list is generated centrally by a designated study biostatistician at the coordinating unit, who maintains the documentation including program codes and the resulting lists include information of randomization dates, personal identification numbers (linkable to study ID number) and the arm allocated. Randomization lists are only shared confidentially to study personnel if needed for study conduct.

### Screening procedures

At every screening attendance, three consecutive tests are conducted in a stepwise manner before biopsy:

1. All participating men give a blood sample for determination of PSA at a local laboratory.
2. If the PSA is 3 ng/ml or higher, a four-kallikrein panel is analyzed from a second vial of plasma from the initial draw using an algorithm incorporating four proteins (total PSA, free PSA, intact PSA and human kallikrein-2) and age. The result is expressed as probability of a clinically significant PCa.
3. Men with both PSA  $\geq 3$  and kallikrein score  $\geq 7.5\%$  are referred to MRI. T2-weighted, diffusion-weighted and dynamic contrast-enhanced imaging is employed in accordance with the European Society for Urogenital Radiology guideline [16]. The findings are classified according to the Prostate Imaging Reporting and Data System (PI-RADS v2.1), which is a 5-point scale to combine the MRI findings and indicate the likelihood of a significant cancer. Scores of 3–5 indicate at least a suspect finding warranting directed biopsy.

Only targeted biopsies are employed, with 2–4 cores per region of interest depending on the size. Only screen-positive men with negative MRI but PSA density  $> 0.15$  undergo systematic biopsy as a safety measure (to avoid missing clinically significant cancers). Similar fusion-guided biopsy systems are used at the two trial sites and evaluated by experienced uropathologists using standardized procedures.

A random sample of screen-negative (on test steps 1 and 2) men are also invited to prostate MRI and asked to give blood, urine and stool samples in order to serve as a control group to estimate frequency of suspicious MRI findings in the general population, and as a reference group in analyses of biological samples.

## Protocol deviations

A tabular presentation of different types of protocol deviations along with their frequencies and percentages will be presented. Any protocol deviations detected after randomization will be carefully documented. Among them, men later found out not to have met the eligibility criteria at the date of randomization will be excluded from the analysis (post-randomization exclusions).

In the case of major protocol violations affecting a substantial proportion of men, separate per protocol analyses will be conducted to support the main analyses. In the screening arm, incomplete attendance, or compliance with the screening procedures is likely to occur. In the control arm, we will obtain data on contamination, i.e., mostly self-initiated PSA testing.

When considering unforeseen lack of compliance with the protocol, all means to ensure objectivity in the exclusion principles from per protocol analyses will be taken. Participants in both arms will be considered according to the same principles. Protocol deviations not related to the screening procedures are expected to appear in approximately 1:3 ratio for the arms. Obvious deviation from this ratio would be reported and interpreted as a potential source of bias.

## Blinding

Blinding in the conventional sense is not applicable: men are aware of being invited to screening. Hence, this is an open trial with screening and control arms.

Concrete measures to prevent bias, if any, from the awareness of the trial arm were nevertheless taken: (i) the control arm is blind to the fact that they are part of the trial; (ii) allocation concealment is ensured by the centralized randomization procedure preventing foreknowledge of upcoming arm allocation; and (iii) communication to the general public on trial is kept to the minimum to prevent contamination (e.g. by self-initiated PSA testing) among men in the control arm.

In addition, we underline that the primary outcome of the study, PCa death, is an objective outcome. The possibility of bias in its evaluation only relates to the assessment of the cause of death. The death certificates are filled by physicians with no involvement in the trial and can be assumed to be independent of trial arm, especially as deaths from prostate cancer are likely to occur years after the diagnosis and hence unaffected by detection through screening or other means. Importantly, a previous study within the ERSPC trial has shown that the cause-of-death data provided by Statistics Finland agreed almost perfectly with the assessment of a blinded expert panel in the Finnish center of the trial and was independent of the trial arm [17, 18].

## Data collection process

Table 1 summarizes the stages of the data collection process, targeted participants, and information and samples obtained.

**Table 1.** Data collection process of the ProScreen trial.

| Process stage           | Target population                                | Information collected                                                                                                                                                                                                                                                                                                                                   | Samples collected                                                                                 |
|-------------------------|--------------------------------------------------|---------------------------------------------------------------------------------------------------------------------------------------------------------------------------------------------------------------------------------------------------------------------------------------------------------------------------------------------------------|---------------------------------------------------------------------------------------------------|
| <b>Baseline</b>         | Participants                                     | Family history<br>Previous PSA and Bx<br>Generic QoL/utility (15D, EQ5D)<br>Out-of-pocket costs<br>PSA and four-kallikrein panel                                                                                                                                                                                                                        | Plasma<br>Serum<br>Whole blood                                                                    |
| <b>MRI</b>              | Men with PSA >3 ng/ml and kallikrein score >7.5% | PIRADS score                                                                                                                                                                                                                                                                                                                                            | Digital image                                                                                     |
| <b>Biopsy</b>           | Screen-positive men                              | Post-biopsy symptoms (0, 30 days)<br><br>Targeted fusion biopsies: number of ROIs, number of biopsies, length of samples,<br><br>Systemic biopsies: Biopsy length, cancer length and Gleason score per sample, total length of samples, total length of cancer, portion of cancer, global Gleason score, portion of Gleason 4 or 5, perineural invasion | Urine<br>Stool<br>RNA, DNA<br>Cancer tissue and prostate tissue<br>Plasma<br>Serum<br>Whole blood |
| <b>Cancer diagnosis</b> | Men with prostate cancer                         | Disease-specific QoL (EPIC-26, MAX-PC)<br><br>Generic QoL/utility (EQ5D, 15D), out-of-pocket costs<br><br>Gleason/ISUP grade group, number of positive cores, length of cancer, treatment, TNM stage                                                                                                                                                    |                                                                                                   |

### Study outcomes and other relevant variables

The primary outcome of the trial is death from prostate cancer. Causes of death will be obtained from the Statistics Finland database and the underlying causes of death will be considered when evaluating if the man died from PCa or from other causes. Cancer cases in the entire trial population including the control arm and non-participants in the screening arm are identified from pathology databases of the two hospitals and through linkages to the Finnish Cancer Registry using the unique PID assigned to all Finnish residents to ensure complete coverage and avoid duplicates (double count).

### Secondary outcomes are:

- Diagnosis of prostate cancer (divided into clinically significant and insignificant)
- Progression to advanced prostate cancer (biochemical relapse or progression to metastatic)
- Death due to any cause
- Cost-effectiveness of screening

Adverse outcome variables to monitor screening-related harms are:

- Overdiagnosis of clinically insignificant prostate cancer
- Quality of life impacts of screening and quality of life among men with PCa (EPIC26 instrument)
- Prostate cancer-related anxiety (MAX-PC questionnaire)
- Complications from biopsy (PRECISION questionnaire)

## Statistical analysis

The main analyses will rely on the intention to screen (ITS) principle and will include all randomized men in the two trial arms who were alive and eligible (free of prostate cancer) at the date of randomization. Those men who became ineligible between the date of randomization and first screening invitation will remain in the ITS analysis set. Men who were ineligible at the time of randomization, but recognized as such only after randomization, will be excluded from the ITS analysis set.

Two-sided statistical tests will be used, and the overall significance level will be set at 5%. Corresponding p-values will be accompanied with estimates of differences and their 95% confidence intervals.

### Analysis of the primary outcome

The primary outcome of the trial is death from prostate cancer. This is a superiority trial regarding the primary outcome and the comparisons between trial arms will be analyzed and presented on this basis.

Those men who survived will be considered as right-censored observations at the time passed between the time of analysis and time of randomization period. Those men who were lost to follow-up (e.g., due to emigration) will be considered as censored at that particular time (e.g., at emigration). Time to death, defined as the difference between the date of death and date of randomization, will be used as the event time for the analysis.

To evaluate differences between screening and control arms in prostate cancer specific mortality, Gray's test [19] for testing the null hypothesis of equality of cumulative incidence functions will be used. This test differs from the commonly used logrank test in how competing risks of death are treated and is based on the subdistribution hazard of prostate cancer cause of death.

The test will be complemented by reporting the number of PCa deaths, number of men at risk and estimated cumulative incidence functions for each trial arm over follow-up time. The arms will be compared in absolute risks (number needed to invite i.e., the inverse of the risk difference and number needed to diagnose per averted prostate cancer death, i.e., the ratio of excess incidence to mortality reduction), as well as and relative measures of effect (hazard ratios). Descriptive summaries will also be presented by trial centers, age group at randomization.

### Secondary analyses of the primary outcome

Fine-Gray model for the subdistribution hazard will be used to conduct analyses adjusted for background factors for the ITS analysis set. Outcomes will be compared between age groups and trial centers, and in case of differences, analyses to control for trial center and for age at randomization (categorized as 50–54, 55–59, 60–65 years) will be conducted.

1  
2  
3 Per protocol analyses excluding men with repeated non-attendance will be conducted. We will  
4 estimate the screening effect on PCa mortality among those with at least one attended screening  
5 round relative to the entire control arm, as well as among those with at least two attended  
6 screening rounds. Additional analyses to correct for contamination and non-compliance, *i.e.*,  
7 estimation of efficacy of screening under ideal circumstances, will be conducted by the method  
8 of Cuzick *et al.* [20].  
9

10 Descriptive analyses to assess effect heterogeneity by center, age group, education and  
11 socioeconomic position will be performed to complement per protocol analyses. Additional  
12 analyses requested by external reviewers or editors in peer-review processes will also be done.  
13  
14

## 15 Analysis of secondary outcomes

### 16 Diagnosis of prostate cancer

17  
18 The analysis of cumulative incidence of PCa by disease aggressiveness intends to assess  
19 screening impact on detection of clinically significant PCa (representing potential benefit  
20 through early treatment) and clinically insignificant PCa (indicating overdiagnosis). The  
21 intention is to assess the extent of detection of clinically significant PCa by screening relative  
22 to the control arm, and extent of overdiagnosis relative to the control arm. This will inform  
23 about the degree of accomplishing rationale of the trial, *i.e.*, detection of aggressive cases at  
24 least similar to that in PSA-based screening, while substantially decreasing the yield of low-  
25 risk cases. As screening advances the time of diagnosis by several years (lead time), cumulative  
26 incidence will be used as the indicator of risk.  
27  
28

29 Disease aggressiveness will be defined by the International Society for Urological Pathology  
30 (ISUP) Gleason grade group. The analyses will be conducted separately for the detection of  
31 clinically significant (Gleason 7+ or ISUP 2+) and clinically insignificant (Gleason <7 or ISUP  
32 1) PCa. In secondary analyses, alternative criteria for csPCa will also be employed including  
33 ISUP 3+ (Gleason 4+3 or higher), maximum length of cancer tissue in biopsy and number of  
34 biopsy cores with cancer.  
35

36 Risk differences and ratios will be used to infer screening benefits and overdiagnosis compared  
37 to the control arm. Besides cumulative incidence, the ratio of aggressive to non-aggressive  
38 cases (or proportion of aggressive cancers out of all PCa) will also be reported.  
39

40 Cumulative incidence for both outcomes will be estimated by trial arm. The overall PCa  
41 incidence combines screening benefits and harms and is thus regarded of minor importance in  
42 the interpretation of screening impact. Tabular presentations of age at diagnosis, disease stage  
43 and grade at diagnosis will be presented.  
44  
45

46 Both intention to screen (by allocation) and per protocol (screening participants and non-  
47 participants) analyses will be conducted for each screening round. For screening participants,  
48 screen-detected and interval cases will be reported separately, and screen-detected cases will  
49 be broken down by those detected in targeted biopsies of MRI-positive lesions (screening  
50 protocol evaluated) and systematic biopsies in screen-negative men with PSA density >0.15  
51 (safety measure to avoid missing clinically significant cases). Any cases detected in a random  
52 sample of screen-negative men invited to MRI (analyses to assess underlying prevalence of  
53 prostate cancer) will also be reported separately. Analyses to evaluate an optimized screening  
54 algorithm will include exclusion of cases with PI-RADS score 3 and kallikrein score calculated  
55 also incorporating information on previous biopsies (ignored in the main analysis), as well as  
56 using higher cut-off values for PSA and the kallikrein score.  
57  
58

### 59 Advanced prostate cancer

1  
2  
3 The analysis of advanced prostate cancer will compare the cumulative incidence of cancer  
4 progression, including metastasis and/or biochemical relapse developing after diagnosis and  
5 primary treatment, between the screening and control arms. The purpose of the analysis is to  
6 evaluate differences between the arms in the risk of developing a potentially lethal, advanced  
7 PCa.  
8

9 The origin of the analysis will be the time of randomization. Cumulative incidence rates will  
10 be estimated by the Kaplan-Meier method, and differences between trial arms will be estimated  
11 by Cox regression models adjusted by age at diagnosis.  
12

### 13 Death due to any cause

14  
15 The analysis of all-cause mortality aims to show that the trials arms are comparable with each  
16 other and the general male population in Finland. These analyses will not inform about the  
17 effectiveness of screening. Cumulative survival and mortality rates will be estimated by the  
18 Kaplan-Meier method, from time of randomization, displayed with frequencies of events and  
19 men at risk by trial arm, and by age at randomization.  
20

21 This analysis will focus on the intention to screen analysis set.  
22

### 23 Cost-effectiveness

24  
25 A cost-effectiveness analysis will be performed, incorporating cost data for both out-of-pocket  
26 estimated from surveys and service cost data collected from health care providers, as well  
27 mortality results (ITS analysis) and utilities based on repeated surveys with 15D and EQ5D  
28 instruments (on a random sample of participants). The comparator is no active screening, here  
29 represented by the control arm. The main outcome is the incremental cost-effectiveness ratio  
30 in terms of costs per quality-adjusted life-year.  
31

32  
33 A preliminary and exploratory cost effectiveness study can be conducted after the last of the  
34 follow-up surveys have been returned, approximately at 3 years after the randomization of the  
35 last man into the trial. We plan to undertake a full cost-effectiveness analysis around the time  
36 when the evidence on the effectiveness of screening regarding primary outcome has been  
37 obtained; this will most likely be near to the analysis at 15 years.  
38

### 39 Quality of life

40  
41 These analyses aim to evaluate the short-term and long-term impacts of screening on generic  
42 quality of life as well as disease-specific quality of life among men with PCa. Two disease-  
43 specific questionnaires, EPIC26 instrument and MAX-PC questionnaires will be used to  
44 measure quality of life at 0, 6, 12, and 24 months from PCa diagnosis in both trial arms.  
45

46 Standard scoring of the EPIC26 instrument will be used. Summary statistics of the five key  
47 domains over time and by trial arm will be calculated to assess changes in quality of life of  
48 men with PCa from diagnosis onwards. Summary and domain-grouped scores will be analyzed  
49 using applications of linear models (or their nonparametric counterparts, if needed) for repeated  
50 measures to evaluate differences in quality of life between the arms following PCa diagnosis.  
51 Analyses will be adjusted by age group and disease aggressiveness (but not by stage, which is  
52 assumed to mediate the effect of screening on QoL through stage shift).  
53

54  
55 Prostate cancer related anxiety is measured with the Memorial Anxiety Scale for Prostate  
56 Cancer (MAX-PC) questionnaire [21]. Results will be presented as frequencies and  
57 percentages for total and subscale scores by trial arm.  
58  
59  
60

1  
2  
3 Generic quality of life and utilities are evaluated using the 15D and EQ5D instruments as  
4 described in the cost-effectiveness section.  
5

### 6 **Analysis of adverse outcomes**

7 In addition to detection of low-risk disease by screening as an indicator of overdiagnosis,  
8 adverse outcomes mainly relate to the harms due to biopsies. Adverse effects of prostate biopsy  
9 are monitored using the questionnaire developed for the PRECISION trial covering pain and  
10 other symptoms immediately after biopsy and at 30 days following biopsy. The number of  
11 biopsies, as well as the number (%) and type of complications among those with biopsies will  
12 be reported.  
13  
14

### 15 **Interim analyses and data monitoring**

16 The first analysis of PCa mortality will be conducted at 10 years and the final analysis at 15  
17 years (i.e. at median follow-up time of 10 or 15 years). As we do not intend to stop the trial at  
18 10 years, these interim analyses will be considered as preliminary information. Interim analyses  
19 at 10 years will include also analyses of shorter-term benefits.  
20

21 To control the overall type I error rate (5%) of the trial, we will employ the O'Brien-Fleming  
22 rule for alpha spending function. We set the amount of information at 0.5 at 10 years based on  
23 the expected numbers of PCa deaths. Thus, by implementation of the O'Brien-Fleming  
24 algorithm, the resulting significance level at 10-year interim analysis will be 0.0056, and at the  
25 15-year final analysis 0.0444.  
26  
27

28 The analyses of secondary outcomes will not be used to infer about the overall effectiveness of  
29 screening. We will consider the analyses of these distinct process measures as individual tests  
30 rather than part of disjunction testing, in which case precise interpretation but not multiplicity  
31 adjustment will be necessary [22, 23].  
32

33 Analyses of secondary endpoints informing about the intermediate outcomes of process  
34 indicators including participation, cancer detection, validity and diagnostic performance of the  
35 tests in the entire population and subgroups (screened men, non-participants, men in the control  
36 arm) will be carried out at regular intervals, as sufficient data become available for evaluation.  
37 These will inform about potential need to modify the procedures. Side studies using the samples  
38 collected will be carried out to identify new indicators of prostate cancer risk and prognosis.  
39  
40

41 An independent data monitoring committee (DMC) oversees the trial conduct, and its main  
42 task is to ensure safety of the participants. Safety in this context means that screening or  
43 screening procedures should not lead to unacceptable disadvantage for the participants in the  
44 light of screening benefits. This could take place if the screening intervention had materially  
45 worse performance in detecting clinically relevant prostate cancer than anticipated, or  
46 substantially higher level of overdiagnosis. The DMC is given a report of the screening results  
47 initially every six months and after the first year every 12 months. The DMC can also request  
48 any additional information they regard as pertinent to their task. In case of concern, the DMC  
49 can recommend discontinuation of the trial; in practice that would mean stopping recruitment  
50 and discontinuation of further screening procedures. In addition, they have a mandate to  
51 suggest modifications to the trial protocol.  
52  
53

### 54 **Handling of missing data**

55 Extent of missing data will be described, for example, by presenting the number of individuals  
56 with missing values per variable.  
57  
58  
59  
60



1  
2  
3 For outcome variables relying on dates – dates of randomization, censoring, diagnosis or death  
4 – incomplete dates will be imputed by 15 (in the case that the day variable was missing, but  
5 known month and year), and by 30/6 (in the case that only the year was known).  
6

7 In case a substantial proportion of men (at least 5%) have missing data on one or more variable  
8 needed for the effectiveness analysis in question, multiple imputation methods will be used to  
9 demonstrate the robustness of findings [24]. Imputation models will include outcome variables  
10 and trial arm in addition to all variables relevant to the particular analysis. Final estimates will  
11 be derived by combining estimates and their standard errors across data sets using Rubin's  
12 rules.  
13  
14

### 15 Data management and quality assurance

16 RedCap database application is used for data management in the trial, covering all major data  
17 types from questionnaires and lab results to MRI findings, diagnoses and causes of death.  
18 RedCap allows access defined by two-factor authentication (2FA) and flexible definition of  
19 user-specific functions and rights.  
20

21 In REDCap, variable specific parameters and predetermined options are used to prevent  
22 entering invalid data (e.g. predefined values and acceptable ranges). All data is verified from  
23 the original data source and monitored monthly. Until the verification, data is saved as  
24 incomplete or unverified. Lead times between screening tests are monitored every 6-8 weeks.  
25 For the laboratory work (including sampling, processing, and storing) each task has a protocol  
26 shared by the study centers. Any deviations from the sample specific protocol are documented.  
27  
28  
29  
30

### 31 References

- 32 1. Culp MB, Soerjomataram I, Efstathiou JA, *et al.* Recent global patterns in prostate  
33 cancer incidence and mortality rates. *Eur Urol* 2020; 77:38-52. PMID: 31493960.
- 34 2. Hugosson J, Roobol MJ, Månsson M, *et al.* 16-year follow-up of the European  
35 Randomised Study of Screening for Prostate Cancer (ERSPC). *Eur Urol* 2019; 76:43-  
36 51. PMID: 30824296.
- 37 3. Pinsky PF, Miller E, Prorok P, *et al.* Extended follow-up for prostate cancer incidence  
38 and mortality among participants in the PLCO screening trial. *BJU Int* 2019;123:854-  
39 860. PMID: 30288918.
- 40 4. Ilic D, Djulbegovic M, Jung JH, *et al.* Prostate cancer screening with prostate-specific  
41 antigen (PSA) test: a systematic review and meta-analysis. *BMJ* 2018; 362:k3519. doi:  
42 10.1136/bmj.k3519. PMID: 30185521.
- 43 5. Fenton JJ, Weyrich MS, Durbin S, *et al.* Prostate-specific antigen-based screening for  
44 prostate cancer. *JAMA* 2018; 319:1914-31. PMID: 29801018.
- 45 6. Paschen U, Sturz S, Flerer D, *et al.* Assessment of prostate-specific antigen screening.  
46 *BJU Int* 2022;129:280-289. PMID: 33961337.
- 47 7. Schoots IG, Roobol MJ, Nieboer D, *et al.* Magnetic resonance imaging-targeted biopsy  
48 may enhance the diagnostic accuracy of significant prostate cancer detection compared  
49 to standard transrectal ultrasound-guided biopsy: a systematic review and meta-  
50 analysis. *Eur Urol* 2015; 68:438-50. PMID: 25480312.
- 51 8. Ahmed HU, El-Shater Bosaily A, Brown LC, *et al.* Diagnostic accuracy of multi-  
52 parametric MRI and TRUS biopsy in prostate cancer (PROMIS): a paired validating  
53 confirmatory study. *Lancet* 2017; 389:815-822. PMID: 28110982.  
54  
55  
56  
57  
58  
59  
60

9. Hugosson J, Månsson M, Wallström J, *et al.* Prostate Cancer Screening with PSA and MRI Followed by Targeted Biopsy Only. *N Engl J Med.* 2022; 387:2126-2137. PMID: 36477032.
10. Eklund M, Jäderling F, Discacciati A, *et al.* MRI-Targeted or Standard Biopsy in Prostate Cancer Screening. *N Engl J Med* 2021; 385:908-920. PMID: 34237810.
11. Gamble C, Krishan A, Stocken D, *et al.* Guidelines for the content of statistical analysis plans in clinical trials. *JAMA* 2017; 318:2337-43. <https://doi.org/10.1001/jama.2017.18556>.
12. Auvinen A, Rannikko A, Taari K, *et al.* A randomized trial of early detection of clinically significant prostate cancer (ProScreen): study design and rationale. *Eur J Epidemiol* 2017; 32:521-527. PMID: 28762124.
13. Statistics Finland's StatFin online service. Available at: <https://statfin.stat.fi/PXWeb/pxweb/en/StatFin/> (Accessed 9 June 2021).
14. Kasivisvanathan V, Stabile A, Neves JB, *et al.* Magnetic Resonance Imaging-targeted Biopsy Versus Systematic Biopsy in the Detection of Prostate Cancer: A Systematic Review and Meta-analysis. *Eur Urol.* 2019;76:284-303. PMID: 31130434.
15. Schoenfeld DA. Sample-size formula for the proportional-hazards regression model. *Biometrics* 1983; 39:499-503. PMID: 6354290.
16. de Rooij M, Israël B, Tummers M, *et al.* ESUR/ESUI consensus statements on multi-parametric MRI for the detection of clinically significant prostate cancer: quality requirements for image acquisition, interpretation and radiologists' training. *Eur Radiol* 2020; 30:5404-5416. PMID: 32424596.
17. Mäkinen T, Karhunen P, Aro J, *et al.* Assessment of causes of death in a prostate cancer screening trial. *Int J Cancer* 2008; 122: 413-417. <https://doi.org/10.1002/ijc.23126>
18. Kilpeläinen TP, Mäkinen T, Karhunen PJ, *et al.* Estimating bias in causes of death ascertainment in the Finnish Randomized Study of Screening for Prostate Cancer. *Cancer Epidemiol* 2016; 45:1-5. PMID: 27636505.
19. Gray RJ: A class of K-sample tests for comparing the cumulative incidence of a competing risk. *Ann Stat* 1988; 16:1141-1154.
20. Cuzick J, Edwards R, Segnan N. Adjusting for non-compliance and contamination in randomized clinical trials. *Stat Med* 1997; 16:1017-29. doi: 10.1002/(sici)1097-0258(19970515)16:9<1017::aid-sim508>3.0.co;2-v. Erratum in: *Stat Med* 2007;26:3821. PMID: 9160496.
21. Roth AJ, Rosenfeld, B, Kornblith AB, *et al.* The memorial anxiety scale for prostate cancer. *Cancer* 2003; 97:2910-18. PMID: 12767107.
22. Parker RA, Weir CJ. Multiple secondary outcome analyses: precise interpretation is important. *Trials* 2022; **23**: 27. <https://doi.org/10.1186/s13063-021-05975-2>
23. Rubin M. When to adjust alpha during multiple testing: a consideration of disjunction, conjunction, and individual testing. *Synthese* 2021; **199**: 10969–11000. <https://doi.org/10.1007/s11229-021-03276-4>
24. Little RJ, D'Agostino R, Cohen ML, *et al.* The prevention and treatment of missing data in clinical trials. *N Engl J Med* 2012; 367:1355-60. PMID: 23034025.

#### Authors' contributions

All authors approved the final version of this manuscript. Study concept and design: AA, AR, JN, JR, KN, TK, TT; drafting of the manuscript: AA, JN; critical revision of the manuscript for important intellectual content: AA, AR, JN, JR, KN, TK, TT.

### Funding statement

This work was supported by the Academy of Finland (grant number 311336) the Finnish Cancer Foundation, the Jane and Aatos Erkko foundation, Competitive State Research Funding administered by Tampere University Hospital (grant number 9V02), and Päivikki and Sakari Sohlberg Foundation.

### Competing interest statement

Antti Rannikko declares receipt of lecture and consultation fees from Janssen and Orion.

For peer review only

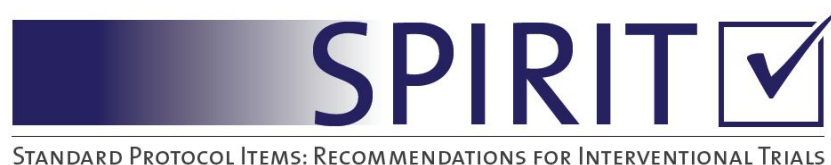

SPIRIT 2013 Checklist: Recommended items to address in a clinical trial protocol and related documents\*

| Section/item                      | Item No | Description                                                                                                                                                                                                                                                                              | Addressed on page number |
|-----------------------------------|---------|------------------------------------------------------------------------------------------------------------------------------------------------------------------------------------------------------------------------------------------------------------------------------------------|--------------------------|
| <b>Administrative information</b> |         |                                                                                                                                                                                                                                                                                          |                          |
| Title                             | 1       | Descriptive title identifying the study design, population, interventions, and, if applicable, trial acronym                                                                                                                                                                             | __ 1 __                  |
| Trial registration                | 2a      | Trial identifier and registry name. If not yet registered, name of intended registry                                                                                                                                                                                                     | __ 1 __                  |
|                                   | 2b      | All items from the World Health Organization Trial Registration Data Set                                                                                                                                                                                                                 | __ N/A __                |
| Protocol version                  | 3       | Date and version identifier                                                                                                                                                                                                                                                              | __ 3 __                  |
| Funding                           | 4       | Sources and types of financial, material, and other support                                                                                                                                                                                                                              | __ 14 __                 |
| Roles and responsibilities        | 5a      | Names, affiliations, and roles of protocol contributors                                                                                                                                                                                                                                  | __ 1 __                  |
|                                   | 5b      | Name and contact information for the trial sponsor                                                                                                                                                                                                                                       | __ N/A __                |
|                                   | 5c      | Role of study sponsor and funders, if any, in study design; collection, management, analysis, and interpretation of data; writing of the report; and the decision to submit the report for publication, including whether they will have ultimate authority over any of these activities | __ N/A __                |
|                                   | 5d      | Composition, roles, and responsibilities of the coordinating centre, steering committee, endpoint adjudication committee, data management team, and other individuals or groups overseeing the trial, if applicable (see Item 21a for data monitoring committee)                         | __ N/A __                |

1 **Introduction**

2

3 Background and rationale 6a Description of research question and justification for undertaking the trial, including summary of relevant studies (published and unpublished) examining benefits and harms for each intervention \_\_\_ 3 \_\_\_

4

5

6 6b Explanation for choice of comparators \_\_\_ NA \_\_\_

7

8 Objectives 7 Specific objectives or hypotheses \_\_\_ 1 \_\_\_

9

10 Trial design 8 Description of trial design including type of trial (eg, parallel group, crossover, factorial, single group), allocation ratio, and framework (eg, superiority, equivalence, noninferiority, exploratory) \_\_\_ 3,8 \_\_\_

11

12

13

14 **Methods: Participants, interventions, and outcomes**

15

16 Study setting 9 Description of study settings (eg, community clinic, academic hospital) and list of countries where data will be collected. Reference to where list of study sites can be obtained \_\_\_ N/A \_\_\_

17

18

19 Eligibility criteria 10 Inclusion and exclusion criteria for participants. If applicable, eligibility criteria for study centres and individuals who will perform the interventions (eg, surgeons, psychotherapists) \_\_\_ 3-4 \_\_\_

20

21

22 Interventions 11a Interventions for each group with sufficient detail to allow replication, including how and when they will be administered \_\_\_ 4-5 \_\_\_

23

24

25 11b Criteria for discontinuing or modifying allocated interventions for a given trial participant (eg, drug dose change in response to harms, participant request, or improving/worsening disease) \_\_\_ N/A \_\_\_

26

27

28 11c Strategies to improve adherence to intervention protocols, and any procedures for monitoring adherence (eg, drug tablet return, laboratory tests) \_\_\_ N/A \_\_\_

29

30

31 11d Relevant concomitant care and interventions that are permitted or prohibited during the trial \_\_\_ N/A \_\_\_

32

33

34 Outcomes 12 Primary, secondary, and other outcomes, including the specific measurement variable (eg, systolic blood pressure), analysis metric (eg, change from baseline, final value, time to event), method of aggregation (eg, median, proportion), and time point for each outcome. Explanation of the clinical relevance of chosen efficacy and harm outcomes is strongly recommended \_\_\_ 7-8 \_\_\_

35

36

37

38

39

40 Participant timeline 13 Time schedule of enrolment, interventions (including any run-ins and washouts), assessments, and visits for participants. A schematic diagram is highly recommended (see Figure) \_\_\_ 4-5 \_\_\_

41

42

43

44

45

46

1 Sample size 14 Estimated number of participants needed to achieve study objectives and how it was determined, including clinical and statistical assumptions supporting any sample size calculations 4

2  
3  
4 Recruitment 15 Strategies for achieving adequate participant enrolment to reach target sample size 4

5  
6 **Methods: Assignment of interventions (for controlled trials)**

7  
8 Allocation:

9  
10 Sequence 16a Method of generating the allocation sequence (eg, computer-generated random numbers), and list of any factors for stratification. To reduce predictability of a random sequence, details of any planned restriction (eg, blocking) should be provided in a separate document that is unavailable to those who enrol participants or assign interventions 4-5

11 generation  
12  
13  
14  
15 Allocation 16b Mechanism of implementing the allocation sequence (eg, central telephone; sequentially numbered, opaque, sealed envelopes), describing any steps to conceal the sequence until interventions are assigned 5

16 concealment  
17 mechanism  
18  
19 Implementation 16c Who will generate the allocation sequence, who will enrol participants, and who will assign participants to interventions 5

20  
21 Blinding (masking) 17a Who will be blinded after assignment to interventions (eg, trial participants, care providers, outcome assessors, data analysts), and how N/A

22  
23 17b If blinded, circumstances under which unblinding is permissible, and procedure for revealing a participant's allocated intervention during the trial N/A

24  
25  
26  
27  
28  
29  
30  
31 **Methods: Data collection, management, and analysis**

32  
33 Data collection 18a Plans for assessment and collection of outcome, baseline, and other trial data, including any related processes to promote data quality (eg, duplicate measurements, training of assessors) and a description of study instruments (eg, questionnaires, laboratory tests) along with their reliability and validity, if known. Reference to where data collection forms can be found, if not in the protocol 7,12

34 methods  
35  
36  
37  
38 18b Plans to promote participant retention and complete follow-up, including list of any outcome data to be collected for participants who discontinue or deviate from intervention protocols N/A

|    |                                 |     |                                                                                                                                                                                                                                                                                                                                       |                |
|----|---------------------------------|-----|---------------------------------------------------------------------------------------------------------------------------------------------------------------------------------------------------------------------------------------------------------------------------------------------------------------------------------------|----------------|
| 1  | Data management                 | 19  | Plans for data entry, coding, security, and storage, including any related processes to promote data quality (eg, double data entry; range checks for data values). Reference to where details of data management procedures can be found, if not in the protocol                                                                     | ___12___       |
| 2  |                                 |     |                                                                                                                                                                                                                                                                                                                                       |                |
| 3  |                                 |     |                                                                                                                                                                                                                                                                                                                                       |                |
| 4  |                                 |     |                                                                                                                                                                                                                                                                                                                                       |                |
| 5  | Statistical methods             | 20a | Statistical methods for analysing primary and secondary outcomes. Reference to where other details of the statistical analysis plan can be found, if not in the protocol                                                                                                                                                              | ___7-11___     |
| 6  |                                 |     |                                                                                                                                                                                                                                                                                                                                       |                |
| 7  |                                 |     |                                                                                                                                                                                                                                                                                                                                       |                |
| 8  |                                 | 20b | Methods for any additional analyses (eg, subgroup and adjusted analyses)                                                                                                                                                                                                                                                              | ___9-11___     |
| 9  |                                 |     |                                                                                                                                                                                                                                                                                                                                       |                |
| 10 |                                 | 20c | Definition of analysis population relating to protocol non-adherence (eg, as randomised analysis), and any statistical methods to handle missing data (eg, multiple imputation)                                                                                                                                                       | ___8, 11-12___ |
| 11 |                                 |     |                                                                                                                                                                                                                                                                                                                                       |                |
| 12 |                                 |     |                                                                                                                                                                                                                                                                                                                                       |                |
| 13 |                                 |     |                                                                                                                                                                                                                                                                                                                                       |                |
| 14 | <b>Methods: Monitoring</b>      |     |                                                                                                                                                                                                                                                                                                                                       |                |
| 15 |                                 |     |                                                                                                                                                                                                                                                                                                                                       |                |
| 16 | Data monitoring                 | 21a | Composition of data monitoring committee (DMC); summary of its role and reporting structure; statement of whether it is independent from the sponsor and competing interests; and reference to where further details about its charter can be found, if not in the protocol. Alternatively, an explanation of why a DMC is not needed | ___11___       |
| 17 |                                 |     |                                                                                                                                                                                                                                                                                                                                       |                |
| 18 |                                 |     |                                                                                                                                                                                                                                                                                                                                       |                |
| 19 |                                 |     |                                                                                                                                                                                                                                                                                                                                       |                |
| 20 |                                 |     |                                                                                                                                                                                                                                                                                                                                       |                |
| 21 |                                 |     |                                                                                                                                                                                                                                                                                                                                       |                |
| 22 |                                 | 21b | Description of any interim analyses and stopping guidelines, including who will have access to these interim results and make the final decision to terminate the trial                                                                                                                                                               | ___11___       |
| 23 |                                 |     |                                                                                                                                                                                                                                                                                                                                       |                |
| 24 |                                 |     |                                                                                                                                                                                                                                                                                                                                       |                |
| 25 | Harms                           | 22  | Plans for collecting, assessing, reporting, and managing solicited and spontaneously reported adverse events and other unintended effects of trial interventions or trial conduct                                                                                                                                                     | ___11___       |
| 26 |                                 |     |                                                                                                                                                                                                                                                                                                                                       |                |
| 27 |                                 |     |                                                                                                                                                                                                                                                                                                                                       |                |
| 28 | Auditing                        | 23  | Frequency and procedures for auditing trial conduct, if any, and whether the process will be independent from investigators and the sponsor                                                                                                                                                                                           | ___N/A___      |
| 29 |                                 |     |                                                                                                                                                                                                                                                                                                                                       |                |
| 30 |                                 |     |                                                                                                                                                                                                                                                                                                                                       |                |
| 31 |                                 |     |                                                                                                                                                                                                                                                                                                                                       |                |
| 32 | <b>Ethics and dissemination</b> |     |                                                                                                                                                                                                                                                                                                                                       |                |
| 33 |                                 |     |                                                                                                                                                                                                                                                                                                                                       |                |
| 34 | Research ethics approval        | 24  | Plans for seeking research ethics committee/institutional review board (REC/IRB) approval                                                                                                                                                                                                                                             | ___1,3___      |
| 35 |                                 |     |                                                                                                                                                                                                                                                                                                                                       |                |
| 36 |                                 |     |                                                                                                                                                                                                                                                                                                                                       |                |
| 37 | Protocol amendments             | 25  | Plans for communicating important protocol modifications (eg, changes to eligibility criteria, outcomes, analyses) to relevant parties (eg, investigators, REC/IRBs, trial participants, trial registries, journals, regulators)                                                                                                      | ___N/A___      |
| 38 |                                 |     |                                                                                                                                                                                                                                                                                                                                       |                |
| 39 |                                 |     |                                                                                                                                                                                                                                                                                                                                       |                |
| 40 |                                 |     |                                                                                                                                                                                                                                                                                                                                       |                |
| 41 |                                 |     |                                                                                                                                                                                                                                                                                                                                       |                |
| 42 |                                 |     |                                                                                                                                                                                                                                                                                                                                       |                |
| 43 |                                 |     |                                                                                                                                                                                                                                                                                                                                       |                |
| 44 |                                 |     |                                                                                                                                                                                                                                                                                                                                       |                |
| 45 |                                 |     |                                                                                                                                                                                                                                                                                                                                       |                |
| 46 |                                 |     |                                                                                                                                                                                                                                                                                                                                       |                |

|    |                               |     |                                                                                                                                                                                                                                                                                     |              |
|----|-------------------------------|-----|-------------------------------------------------------------------------------------------------------------------------------------------------------------------------------------------------------------------------------------------------------------------------------------|--------------|
| 1  | Consent or assent             | 26a | Who will obtain informed consent or assent from potential trial participants or authorised surrogates, and how (see Item 32)                                                                                                                                                        | __N/A__      |
| 2  |                               |     |                                                                                                                                                                                                                                                                                     |              |
| 3  |                               |     |                                                                                                                                                                                                                                                                                     |              |
| 4  |                               | 26b | Additional consent provisions for collection and use of participant data and biological specimens in ancillary studies, if applicable                                                                                                                                               | __N/A__      |
| 5  |                               |     |                                                                                                                                                                                                                                                                                     |              |
| 6  |                               |     |                                                                                                                                                                                                                                                                                     |              |
| 7  | Confidentiality               | 27  | How personal information about potential and enrolled participants will be collected, shared, and maintained in order to protect confidentiality before, during, and after the trial                                                                                                | __N/A__      |
| 8  |                               |     |                                                                                                                                                                                                                                                                                     |              |
| 9  |                               |     |                                                                                                                                                                                                                                                                                     |              |
| 10 | Declaration of interests      | 28  | Financial and other competing interests for principal investigators for the overall trial and each study site                                                                                                                                                                       | __N/A__      |
| 11 |                               |     |                                                                                                                                                                                                                                                                                     |              |
| 12 |                               |     |                                                                                                                                                                                                                                                                                     |              |
| 13 | Access to data                | 29  | Statement of who will have access to the final trial dataset, and disclosure of contractual agreements that limit such access for investigators                                                                                                                                     | __N/A__      |
| 14 |                               |     |                                                                                                                                                                                                                                                                                     |              |
| 15 |                               |     |                                                                                                                                                                                                                                                                                     |              |
| 16 | Ancillary and post-trial care | 30  | Provisions, if any, for ancillary and post-trial care, and for compensation to those who suffer harm from trial participation                                                                                                                                                       | __N/A__      |
| 17 |                               |     |                                                                                                                                                                                                                                                                                     |              |
| 18 |                               |     |                                                                                                                                                                                                                                                                                     |              |
| 19 |                               |     |                                                                                                                                                                                                                                                                                     |              |
| 20 | Dissemination policy          | 31a | Plans for investigators and sponsor to communicate trial results to participants, healthcare professionals, the public, and other relevant groups (eg, via publication, reporting in results databases, or other data sharing arrangements), including any publication restrictions | __3__        |
| 21 |                               |     |                                                                                                                                                                                                                                                                                     |              |
| 22 |                               |     |                                                                                                                                                                                                                                                                                     |              |
| 23 |                               |     |                                                                                                                                                                                                                                                                                     |              |
| 24 |                               | 31b | Authorship eligibility guidelines and any intended use of professional writers                                                                                                                                                                                                      | __N/A__      |
| 25 |                               |     |                                                                                                                                                                                                                                                                                     |              |
| 26 |                               | 31c | Plans, if any, for granting public access to the full protocol, participant-level dataset, and statistical code                                                                                                                                                                     | __N/A__      |
| 27 |                               |     |                                                                                                                                                                                                                                                                                     |              |
| 28 |                               |     |                                                                                                                                                                                                                                                                                     |              |
| 29 | <b>Appendices</b>             |     |                                                                                                                                                                                                                                                                                     |              |
| 30 |                               |     |                                                                                                                                                                                                                                                                                     |              |
| 31 | Informed consent materials    | 32  | Model consent form and other related documentation given to participants and authorised surrogates                                                                                                                                                                                  | __attached__ |
| 32 |                               |     |                                                                                                                                                                                                                                                                                     |              |
| 33 |                               |     |                                                                                                                                                                                                                                                                                     |              |
| 34 | Biological specimens          | 33  | Plans for collection, laboratory evaluation, and storage of biological specimens for genetic or molecular analysis in the current trial and for future use in ancillary studies, if applicable                                                                                      | __N/A__      |
| 35 |                               |     |                                                                                                                                                                                                                                                                                     |              |
| 36 |                               |     |                                                                                                                                                                                                                                                                                     |              |

37 \*It is strongly recommended that this checklist be read in conjunction with the SPIRIT 2013 Explanation & Elaboration for important clarification on the items.  
 38 Amendments to the protocol should be tracked and dated. The SPIRIT checklist is copyrighted by the SPIRIT Group under the Creative Commons  
 39 "[Attribution-NonCommercial-NoDerivs 3.0 Unported](#)" license.  
 40
